# Supplementary material
Source: PubMed Central journal article supplement (PMC6051308)
Supplement: mmc5.pdf [file mmc5.pdf]

# Dynamic Clustering of Dyneins on Axonal Endosomes: Evidence from High-Speed Darkfield Imaging

Praveen D. Chowdary,<sup>1</sup> Luke Kaplan,<sup>1</sup> Daphne L. Che,<sup>1</sup> and Bianxiao Cui<sup>1,\*</sup>

<sup>1</sup>Department of Chemistry, Stanford University, Stanford, California

**ABSTRACT** One of the fundamental features that govern the cooperativity of multiple dyneins during cargo trafficking in cells is the spatial distribution of these dyneins on the cargo. Geometric considerations and recent experiments indicate that clustered distributions of dyneins are required for effective cooperation on micron-sized cargos. However, very little is known about the spatial distribution of dyneins and their cooperativity on smaller cargos, such as vesicles or endosomes <200 nm in size, which are not amenable to conventional immunostaining and optical trapping methods. In this work, we present evidence that dyneins can dynamically be clustered on endosomes in response to load. Using a darkfield imaging assay, we measured the repeated stalls and detachments of retrograde axonal endosomes under load with <10 nm localization accuracy at imaging rates up to 1 kHz for over a timescale of minutes. A three-dimensional stochastic model was used to simulate the endosome motility under load to gain insights on the mechanochemical properties and spatial distribution of dyneins on axonal endosomes. Our results indicate that 1) the distribution of dyneins on endosomes is fluid enough to support dynamic clustering under load and 2) the detachment kinetics of dynein on endosomes differs significantly from the *in vitro* measurements possibly due to an increase in the unitary stall force of dynein on endosomes.

## INTRODUCTION

Cytoplasmic dynein drives the long-distance trafficking of various cellular cargos toward the minus-ends of microtubules in eukaryotic cells (1–5). Though dynein is a weak motor with a modest stall force of 1.1 pN *in vitro*, the collective function of multiple dyneins can generate forces up to 20 pN on large cargos in cells (6,7). Dynein-specific properties like adaptable stepping, convex force-velocity relationship, and catch-bond detachment kinetics make it highly conducive for dyneins to work cooperatively as a team (7). This cooperation is fundamental for the diverse range of dynein-driven processes in cells, besides cargo trafficking, that entail mechanical forces higher than a few pN.

An important facet governing the cooperative function of cargo-bound dyneins is the spatial distribution of dyneins on cargo, which determines the number of dyneins that are geometrically active (i.e., can bind to the microtubule) simultaneously and can cooperate effectively. Erickson and coworkers used simulations to show that the geometric activity and cooperation between motors is facilitated by

clustered distribution of motors for large micron-sized cargos (8). Recently, Rai and coworkers used optical trapping, immunostaining, and pharmacological studies to show that clustered distribution of dyneins on late phagosomes (1–2  $\mu\text{m}$  in size) is critical for the phagosome trafficking in cells (9). They also discussed the structural interactions that cluster dyneins within cholesterol microdomains on the phagosomes. It is very likely that the functional relevance for dynein clustering and the underlying clustering mechanism is cargo specific.

The importance of dynein clustering for effective cooperation on micron-sized cellular cargos is quite apparent from the geometric considerations of dynein length and cargo size (8,9). However, not much is known about the spatial distribution of dyneins and their cooperativity on smaller cargos like vesicles or endosomes around 100–200 nm in size. Optical trapping approaches that measure the cumulative force of dyneins on cargos are limited to just a few large micron-sized cargos (6,7,10,11). Further, optical traps can only probe the geometrically active motor forces and cannot report directly on the spatial distribution of dyneins on the cargo. Probing the spatial distribution of dyneins on such small cargos in cells is also not practical with immunostaining methods (12). New approaches are therefore needed to

Submitted February 1, 2018, and accepted for publication May 2, 2018.

\*Correspondence: [bcui@stanford.edu](mailto:bcui@stanford.edu)

Editor: Julie Biteen.

<https://doi.org/10.1016/j.bpj.2018.05.026>

© 2018

study smaller cellular cargos for better insights into the cellular mechanisms assisting the clustering and cooperativity of dyneins. In this work, we present experimental data and model simulations to support a hypothesis that dyneins can dynamically be clustered on endosomes in cells based on new experimental data on endosomes under load in axons and three-dimensional (3D) model simulations.

Our recent studies indicate that the robust long-distance retrograde transport of endosomes, as small as 100–200 nm, along the axons of neurons is driven cooperatively by multiple dyneins (13,14). We also reported an approach that permitted us to study the retrograde endosome transport under load. Specifically, we showed that retrograde endosomes carrying fluorescent nanoparticles could be tethered in axons stochastically depending on the laser illumination power (14). Though the tether mechanism is not yet clear, the elastic tether force opposes the dyneins hauling the endosomes, resulting in repeated stalls and detachments of endosomes that are remarkably similar to the records of cargos under load in optical traps (7). The repeated stall/detachment profiles of the endosomes under load are expected to be sensitive to the spatial distribution and detachment kinetics of dyneins on endosomes. However, fluorescence-based imaging limited the number of stalls/detachments seen per endosome due to photobleaching and irreversible endosome stalling at the laser power required for good spatiotemporal resolution. In this work, we report a low-power darkfield imaging assay for the long-term tracking of retrograde endosomes, carrying gold nanoparticles, with <10 nm spatial resolution at imaging rates up to 1 kHz. This method permitted us in a few cases to capture hundreds of stalls and detachments of the same endosome under load and made single-endosome mechanical analysis possible. We then formulated a 3D stochastic model, which incorporates the translational, rotational, and thermal motions of the endosome driven by multiple dyneins and the dynamics of dynein-endosome contact positions, to simulate the endosome stalls and detachments under load. Our model is successful in quantitatively simulating all the features and statistics of the experimental stall/detachment profiles and gave insights on the mechanochemical properties and spatial distribution of dyneins on endosomes. Based on these results, we hypothesize that dyneins can dynamically be clustered on endosomes in response to load. The dynamic clustering of dyneins can be a particularly efficient mechanism for smaller cargos, but larger cargos may need additional structural interactions, as is the case for phagosomes (9).

## METHODS

### Conjugation of gold nanoparticles with wheat germ agglutinin

Streptavidin functionalized gold nanoparticles (GNPs in phosphate-buffered saline (PBS), 80 nm) were purchased from Nanopartz (Loveland,

CO). The GNPs were coated with wheat germ agglutinin (WGA) using biotin-avidin covalent interaction to obtain GNP-WGA as follows. In a typical conjugation procedure, 20  $\mu\text{L}$  of the GNPs in PBS (1 nM) is sonicated for 10 s, and 8  $\mu\text{L}$  of biotin-WGA (1  $\mu\text{M}$ ) is added and the mixture is left standing for 30 min. The GNPs were then spun down by centrifugation at 3000 rpm for 10 min, and the supernatant with unconjugated WGA was discarded (repeated twice). The GNP-WGA conjugate was then made up in 20  $\mu\text{L}$  culture medium and was briefly sonicated for 10–15 s before adding to the dorsal root ganglion (DRG) neuron culture.

### Microfluidic device for DRG neuron culture compatible with darkfield imaging

The use of microfluidic devices for primary neuron culture had been documented by us elsewhere (15,16). These devices, made of polydimethylsiloxane (PDMS), were typically  $\sim 5$  mm in thickness and were compatible with objective-based oblique illumination fluorescence imaging of axonal transport. In this work, we used PDMS devices  $\sim 1$  mm in thickness compatible with dark field imaging of axonal transport (see below). The device fabrication was as reported before, but in this study, we used an 8:1 weight ratio of silicone elastomer and curing agent to enhance the mechanical stability of the thinner PDMS devices. DRG neurons were cultured in these devices as reported earlier, and we used mature DRG cultures (7–10 days old) for the transport studies.

### Dark field imaging of GNP-endosome transport in microfluidic DRG neuron cultures

We customized an inverted microscope (Nikon Eclipse Ti-U; Nikon, Tokyo, Japan) for the dark field imaging of GNP-endosomes in axons with high spatial localization accuracy (<10 nm) at imaging rates up to 1 kHz. Briefly, unpolarized white light from a halogen lamp is focused by a high numerical aperture condenser (NA = 1.4) through a light stop that selects highly oblique rays to illuminate the sample. An adjustable NA objective (NA  $\sim 0.8$ –1.25) collects only the scattered light, which is spectrally filtered (selecting 550–650 nm) and focused onto a fast sCMOS camera. We obtained the localization accuracy (<10 nm, Fig. S1) of our imaging system from the position uncertainty of GNPs stuck on cover slips, as detailed in the literature (17).

The axon terminals or cell bodies in the microfluidic culture were selectively incubated with GNP-WGA (0.5 nM), which was washed off using culture medium after 30 min. Shortly before imaging, the culture medium was replaced with  $\text{CO}_2$  independent medium, and the culture was capped on top with a cover slip to form a  $\sim 1$  mm thick microfluidic device compatible with the working distance of the high-NA condenser and dark field imaging. The culture was imaged on a water-heated custom microscope stage set to maintain the culture at 31°C. Maintaining the culture at physiological temperature 37°C required heating the optical components, which are in oil contact, to >45°C and was hence not preferred. Imaging was started typically 2 h after the incubation start and restricted to <45 min session. Time-lapse videos of endosome transport were acquired at 100–1000 frames per second with the illumination power in the range of 0.25–1 mW/cm<sup>2</sup>.

### 3D stochastic model simulation of GNP-endosome motion and detachments

We built a 3D stochastic model, based on earlier models (8,13) with key modifications, to simulate the collective function of dyneins on endosomes under load (Fig. 4). Briefly, our model considers a stable number of dyneins, distributed randomly or in a clustered geometry, on a spherical endosome connected to the microtubule (along the  $x$  axis of laboratory frame). The dynamics of individual dyneins, which determine the endosome motion, are governed by their microtubule-binding, unbinding, forward- or

backward-stepping rates that include the load dependence of velocities and detachment kinetics. The endosome motion is separated into translational and rotational components, and the thermal fluctuations on endosome are explicitly incorporated in both these components. In addition, our model also considers the fluidity of dynein-distribution on endosomes under load by incorporating the motor-endosome contact point diffusion and drift under mechanical torque on the endosome surface. To simulate the tethered endosome motility, we modeled the tether as a linear-elastic spring docking the endosome to the microtubule. The elastic tether buckles freely but exerts a restoring force when stretched beyond its rest length. The cooperative function of dyneins moving the tethered endosome against this restoring force results in repeated stalls and detachments, which are quantified and compared to experimental data. Most of the parameters in our model are constrained by experimental data from this study or from literature (7,18). A detailed description of the model, the Monte Carlo simulation algorithm, and the parameter selection is given in the [Supporting Material](#).

## RESULTS

### Darkfield imaging of retrograde axonal endosome transport in microfluidic neuron cultures

#### Enhanced accuracy and time resolution

In earlier studies, we reported the real-time tracking of retrograde axonal endosome transport using receptor-mediated endocytosis of WGA-coated fluorescent quantum dots/nanoparticles and fluorescence imaging in microfluidic neuron cultures (13,14). Using intensely fluorescent nanoparticles (100 nm), we reported a localization accuracy of  $\sim 25$  nm at 150 Hz imaging rate and a laser illumination power of  $45 \text{ W/cm}^2$ . Here, we tracked the retrograde transport of endosomes carrying gold nanoparticles (GNPs, 80 nm) using darkfield imaging as described in [Methods](#). The extremely high scattering cross section of GNPs in the visible range improved the localization accuracy to  $< 10$  nm at imaging rates up to 1 kHz and low illumination power of  $< 1 \text{ mW/cm}^2$  (Fig. S1). Further, the low power darkfield illumination is noninvasive and enabled us to track the same GNP-endosome for tens of minutes without any degradation in GNP scattering. The imaging frame rate in our experiments is limited by the size of imaging field, which was  $14 \times 140 \mu\text{m}^2$  for 1 kHz frame rate.

#### Axonal transport imaging

The strong scattering signal from GNPs allowed us to visualize the GNP-endosome transport in axons directly from the eyepiece of microscope, which made it convenient to select the regions of interest to be imaged. The imaging was carried out in axonal segments far from (hundreds of microns) the terminals and cell bodies, following distal incubation of WGA-GNPs. We observed robust internalization and fast retrograde transport of GNPs in axons within an hour of incubating with 0.5 nM WGA-GNP. The GNP-endosome motion is highly processive and almost unidirectional in retrograde direction (Fig. 1 A; Video S1). Most endosomes traversed the imaging field of view ( $140 \mu\text{m}$ ) with no indication of detachment from the microtubules and diffusion within axons.

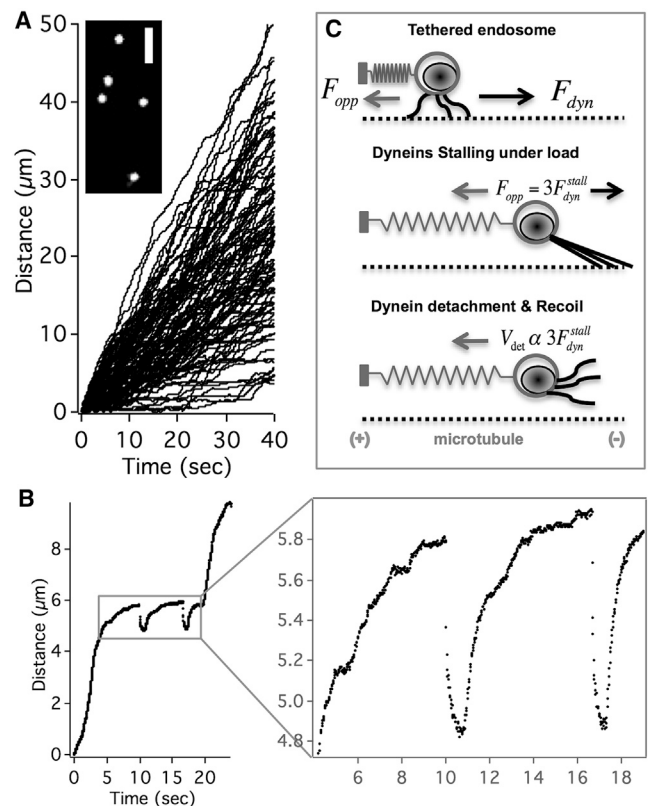

FIGURE 1 Retrograde GNP-endosomes under load. (A) Unidirectional trajectories of retrograde GNP-endosomes in axons captured by darkfield imaging are shown. The inset shows a snapshot of GNP-endosomes transporting in axons. Scale bars,  $3 \mu\text{m}$ . (B) Gradual stalls and fast reversals (“jumps”) exhibited by GNP-endosomes in axons are shown. (C) The elastic tether model explains the endosome jumps as the gradual stalling and detachment of dyneins under load.

The transport pattern of GNP-endosome transport is comparable to that of quantum dot-endosomes (13) indicating that the GNP is not perturbing the mechanics of endosome transport. The predominant unidirectionality makes the retrograde GNP-endosome transport in axons a fitting system to study the mechanics of multiple dyneins in cells.

#### Tethering of endosomes and long-term imaging of endosome jumps

Recently, we developed a technique termed nanoparticle-assisted optical tethering of endosomes (NOTE) in axons (14). Specifically, we showed that retrograde endosomes carrying fluorescent nanoparticles (30–100 nm) could become stochastically tethered to the microtubule during transport, depending on the fluorescence laser illumination power. We find that a few of the retrogradely moving GNP-endosomes ( $< 5\%$  at  $1 \text{ mW/cm}^2$ ) also behaved similarly, as if they were docked to the microtubule by an elastic tether (Fig. 1 B; Video S2). The opposing force from the elastic tether resulted in these GNP-endosomes gradually stalling and snapping back due to the lead-dyneins detaching from the

microtubule (Fig. 1 C). The gradual stalls and fast reversals, referred to as “endosome jumps,” are remarkably similar to the records of cellular cargos in optical traps (7) and contain valuable information on the collective function of dyneins on the endosomes under load. In the case of endosomes with fluorescent nanoparticles (14), the endosomes typically became stationary after a few jumps at the laser illumination power of  $45 \text{ W/cm}^2$  and the imaging resolution degraded within a few minutes due to photobleaching. In contrast, at the low power darkfield illumination, the GNP-endosomes often resumed retrograde transport after a few jumps and in a few cases exhibited tens to hundreds of jumps at the same axonal location over tens of minutes of imaging (Video S3). Such long-term tracking of the sequential stalls and detachments of the same GNP-endosome with darkfield imaging made it possible for us to undertake single-endosome and individual motor motility analysis as detailed below.

### Retrograde endosome transport under load: single-endosome analysis

#### Endosome jump sizes

Fig. 2 A shows a retrograde moving endosome exhibiting hundreds of jumps at the same axonal location over 18 min of imaging at 100 fps before resuming normal retrograde transport. This trajectory is extracted from multiple sequential videos with drift correction using stationary scattering objects within the videos as internal references. We then estimated the endosome jump size as the difference between the maximum position reached within each jump

event and the approximated tether location (dotted line in Fig. 2 A). The endosome exhibits a wide range of jump sizes from 110 to 900 nm, as shown in Fig. 2 B, which indicates the activity of multiple dyneins stochastically sharing the load on endosome. We note that the jump sizes are approximate since the tether location is not precisely known and some residual drift within the trajectory cannot be ruled out altogether. Nonetheless, the distribution of jump sizes exhibited an apparent peak multiplicity of  $\sim 120 \text{ nm}$  (Fig. S5 D). Assuming the 120 nm jumps are single dynein events, we can infer the cooperative activity of  $\sim 8$  dyneins on the endosome.

#### Recoil velocities

Similar conclusion can be reached from the recoil velocity of the stalled endosome upon detachment, which is related to the cumulative stall force of lead-dyneins. Fig. 2 C shows the distribution of the maximal frame velocity ( $V_{maxf}$  obtained for each endosome jump as the maximal frame-to-frame distance covered per unit time during recoil) of the recoiling endosome within each jump. This distribution ranged up to  $35 \mu\text{m/s}$  and exhibited a discrete peak structure with a multiplicity of  $\sim 5.1 \mu\text{m/s}$  (Fig. S5 E). It can be shown (Supporting Material) that  $V_{maxf}$  is linearly related to the instantaneous detachment velocity ( $V_{detach}$ ), which is proportional to the cumulative stall force of the lead-dyneins (14). Therefore, the peak multiplicity in Fig. 2 C can be attributed to the cooperative activity of at least six dyneins stochastically sharing the load on the endosome. Notably, while the recoil velocity distribution averages around the activity of two to three dyneins, the jump size distribution

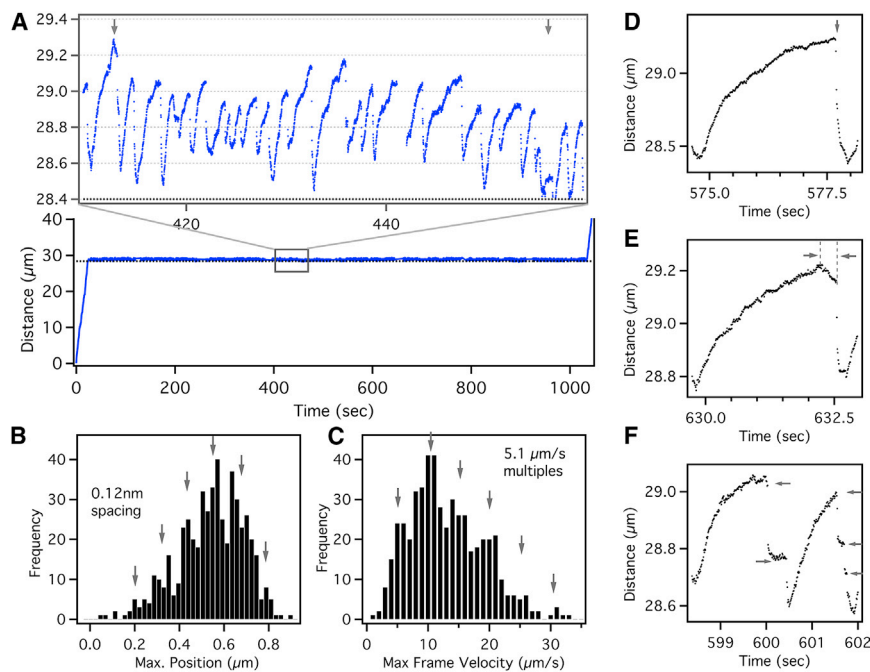

FIGURE 2 (A) Repeated stalls and detachments of a retrograde GNP-endosome under load. The black dotted line is the estimated location of the tether. (B) Histogram of endosome jump size, obtained as the maximum distance covered within each jump relative to the tether location, exhibits peak multiplicity of  $\sim 120 \text{ nm}$ . (C) Histogram of maximum frame velocity ( $V_{maxf}$ ) within each jump exhibits peak multiplicity of  $\sim 5.1 \mu\text{m/s}$ . (D) Sudden detachment recoil profile is shown. (E) Delayed detachment recoil profile is shown. (F) Sequential detachment recoil profile is shown. To see this figure in color, go online.



averages around the activity of four to five dyneins. It is plausible that some of the endosome jumps exhibit much lower  $V_{maxf}$  than expected due to the endosome recoil profiles being abruptly interrupted as detailed below.

#### Recoil profiles

We see a wide range of recoil profiles following dynein detachment over these hundreds of endosome jumps. In many cases the recoil profile is a sharp exponential decay (Fig. 2 D), indicating that the detachment of multiple lead dyneins happens in quick succession. The fast exponential recoil of the endosome after lead-dynein detachment is often interrupted within 40–60 ms, possibly by the presence of lagging microtubule-bound dyneins or by the rebinding of detached dyneins to the microtubule. On average, the complete endosome recoil lasted  $\sim 180$  ms before dynein driven retrograde movement resumed for the next stall/jump. Interestingly, we also see delayed detachment profiles, although less frequently, as shown in Fig. 2 E. Such profiles likely arise due to partial detachment of lead-dyneins followed by the backward stepping of remaining lead-dyneins under super-stall load before detaching from the microtubule. Occasionally, we see sequential detachment of dyneins apparent as a step pattern in the recoil profile (Fig. 2 F).

#### Sequential stalls/detachments

In order to quantify the repeated stall and detachment profiles, we used an automated sliding window analysis to identify the maximal position ( $q_{max}$ ) reached within a stall event, the detachment position ( $q_{det}$ ) after the stall, and the minimum position ( $q_{min}$ ) reached after the detachment (Fig. 3 A; Fig. S2). Fig. 3 B shows the histograms of the minima, maxima, and detachment positions within each jump for the endosome in Fig. 2. We then quantified the stalls/detachments in terms of three statistical metrics namely the stall duration ( $T_S$ ), the detachment duration ( $T_D$ ), and the recoil duration ( $T_R$ ), as shown in Fig. 3 A. The distributions of these dynamic variables are shown in Fig. 3, C–E and the mean statistics are summarized in Table 1. These distributions, obtained from sequential stalls/detachments of the endosome over a long time, can provide valuable insights on the mechanochemical properties and spatial distribution of dyneins on the endosome by guiding accurate models.

#### Gradual variations in motor forces

An intriguing feature in the repeated detachments of the endosome in Fig. 2 is the gradual variation of the detachment velocities (i.e., cumulative dynein forces) over a timescale of minutes. Fig. 3 F shows the maximal frame velocity  $V_{maxf}$  within each successive jump (black markers) in Fig. 2, which highlights the stochastic variation in the lead-dyneins sharing load. On the other hand, the rolling average of  $V_{maxf}$  (red curve in Fig. 3 F) reveals two notable features. Firstly, there is a gradual variation in the average  $\langle V_{maxf} \rangle$  over a series of 100–200 detachments as seen from the autocorre-

lation of  $\langle V_{maxf} \rangle$  in Fig. 3 G. Secondly, there is a gradual increase in  $\langle V_{maxf} \rangle$  over the timescale of 1000 s until the endosome eventually broke free and resumed retrograde transport. These observations suggest that the cumulative dynein forces acting on the endosome are dynamic and can gradually evolve over a timescale of minutes. Recently, there have been a few studies probing the collective forces of dyneins on large cellular cargos using calibrated optical traps (6,7,9). However, none of the studies probed the same cargo over a long period of time. Our results suggest that such long time trapping studies could be valuable in understanding the dynamic nature of the cargo transport machinery. We note that the single-endosome motility analysis presented above is also done on a few other endosomes exhibiting repeated stalls and detachments. Fig. S3 shows another representative example of an endosome, imaged at 500 fps, exhibiting  $\sim 200$  jumps over 14 min.

### 3D stochastic model simulations of multi-dynein endosome transport under load

In order to analyze the single-endosome stalls/detachments we built a 3D stochastic model, based on the prototype by Erickson and coworkers (8), to simulate the endosome motility under elastic load (see Methods and Supporting Material). In our Monte Carlo model simulations, an endosome driven by multiple dyneins is linked to the microtubule by an elastic tether that exerts a restoring force when stretched beyond its rest length (Fig. 4 A). The collective function of dyneins against the restoring force of the tether results in repeated endosome stalls and detachments, which can be quantified and compared to the experimental data.

The key model parameters are the endosome size, axonal viscosity, number of dyneins, tether stiffness, mechanochemical properties of dyneins, and the spatial distribution of dyneins on the endosome. For a given endosome exhibiting tens of stalls and detachments, most of these model parameters can be estimated from the experimental data as detailed below and in the Supporting Material. Within the constraints of experimental data, we extensively analyzed a few specific considerations in our simulations including 1) the stall force and detachment kinetics of dyneins on endosomes, 2) the spatial distribution of dyneins on endosomes (Fig. 4 B), and 3) the diffusion of motor-endosome contact positions on the endosome surface (Fig. 4 C). Our model simulations successfully replicated the variety of experimental stall and detachment profiles as well as the overall single-endosome experimental statistics (Fig. 5) to aid our understandings on the collective function of dyneins on endosomes (detailed below).

#### *In vitro mechanochemical properties cannot simulate experimental stall/detachment profiles*

First, we tried to simulate the main statistical metrics quantifying the single-endosome stalls and detachments (i.e.,

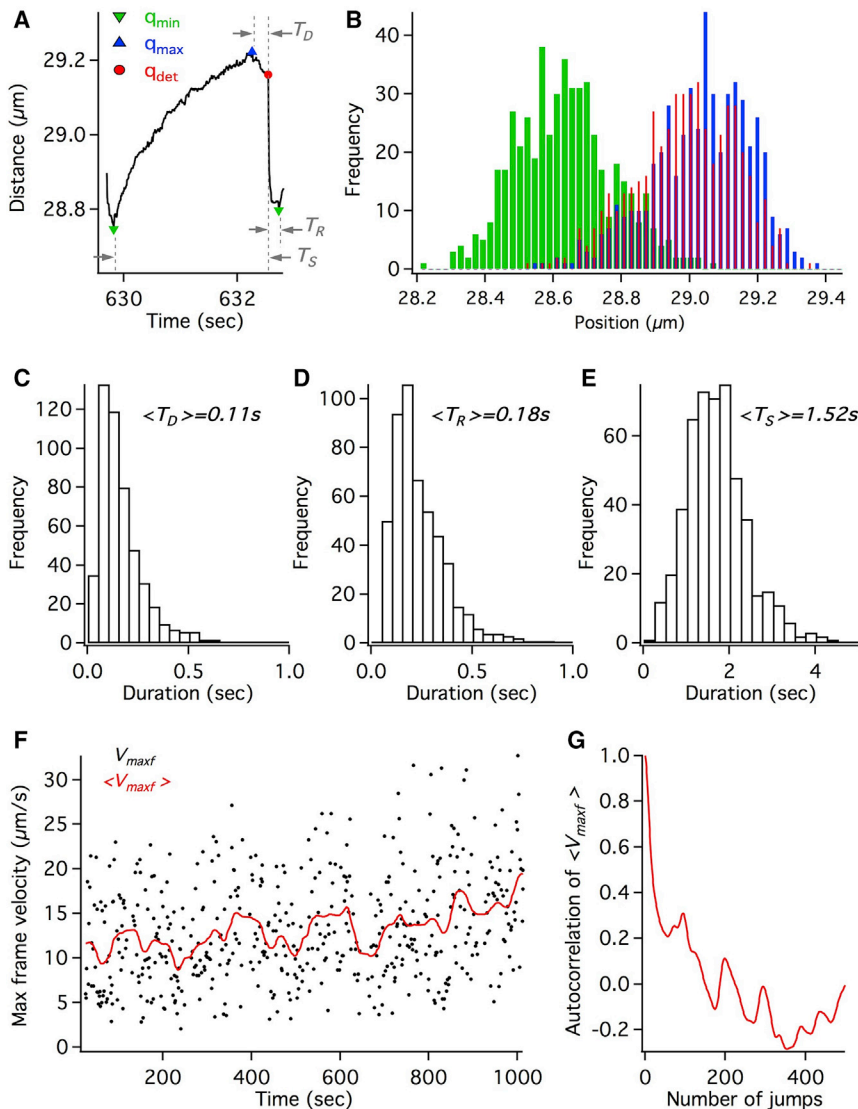

FIGURE 3 Single endosome statistics obtained from the multiple endosome jumps in Fig. 2. (A) A depiction of the stall duration  $T_S$ , detachment duration  $T_D$ , and the recoil duration  $T_R$ , based on the minimal ( $q_{min}$ ), maximal ( $q_{max}$ ), and detachment ( $q_{det}$ ) positions within the endosome jump is shown. (B) Histograms of  $q_{min}$ ,  $q_{max}$ , and  $q_{det}$  positions are shown. The distributions of  $T_D$ ,  $T_R$ , and  $T_S$  are shown in (C), (D), and (E), respectively. (F) The maximum frame velocity  $V_{maxf}$  within each successive jump is shown as a function of time (black markers). The moving average  $\langle V_{maxf} \rangle$  (red line) shows the dynamic variation of detachment velocities over a span of minutes. (G) The autocorrelation of  $\langle V_{maxf} \rangle$  is shown.

stall duration  $T_S$ , detachment duration  $T_D$ , and recoil duration  $T_R$ ) in Fig. 2, by constraining the mechanochemical properties of dynein in the model to in vitro measurements (18). Specifically, the unitary stall force of dynein ( $F_s = 1.25$  pN), the load dependence of dynein-stepping rates, and catch-bond detachment kinetics are fixed to in vitro measurements (Supporting Material). We estimated the other model parameters from the experimental data as follows. 1) The forward/backward stepping rates can be estimated from the net velocity of freely moving endosomes before the initiation of jumps. 2) Considering the jump size of 120 nm as a single dynein event, the tether stiffness is given by  $k = F_s/120$ , where  $F_s$  is the single dynein stall force. 3) We then fit a few jumps with uninterrupted exponential recoil profiles to extract the damping constant  $k/\gamma$  (Eq. S1) and thereby the friction coefficient  $\gamma$  using  $k$  from the previous step. 4) From the effective axonal viscos-

ity ( $0.05\text{--}0.2$  Ns/m<sup>2</sup>) and known  $\gamma$ , we can estimate the endosome size using the Stokes relation. 5) From the peak structure in jump sizes and detachment velocities, we can estimate the number of cooperating dyneins on the endosome to be  $\sim 8$ . Our simulations spanned a reasonable range of model parameters around these experimental estimates (Table 1).

Our simulations show that the in vitro model has significant limitations in replicating the experimental metrics (Table 1, rows A–J). Basically, the dynein detachment under load in the in vitro model is too fast for efficient cooperation between dyneins and resulted in the average stall durations 40–50% lower than the experiment. Decreasing the detachment rate to enhance the dynein cooperativity, on the other hand, resulted in delayed detachment profiles with average detachment durations twofold higher than the experiment. Further, the histograms of the minima, maxima, and

**TABLE 1** 3D Model Simulation of the Tethered Single Endosome Dynamics

|   | Model            | Detach Kinetics | Dynein Dist.   | $T_D$ (s) | $T_R$ (s) | $T_S$ (s) | $V_{maxf}$ ( $\mu\text{m/s}$ ) | $L_d$ |
|---|------------------|-----------------|----------------|-----------|-----------|-----------|--------------------------------|-------|
|   | endosome: Fig. 2 |                 |                | 0.11      | 0.18      | 1.52      | 11.6                           |       |
| A | IVT, $N_d = 8$   | CB              | random         | 0.14      | 0.13      | 1.10      | 4.21                           | 1.96  |
| B | IVT, $N_d = 8$   | EXPN            |                | 0.08      | 0.11      | 0.75      | 6.21                           | 1.68  |
| C | IVT, $N_d = 6$   | CB              | $\Theta = 5$   | 0.17      | 0.12      | 1.14      | 4.04                           | 3.11  |
| D | IVT, $N_d = 6$   | EXPN            |                | 0.10      | 0.11      | 1.06      | 10.0                           | 3.10  |
| E | IVT, $N_d = 6$   | CB              | $\Theta = 30$  | 0.17      | 0.12      | 1.06      | 3.94                           | 3.01  |
| F | IVT, $N_d = 6$   | EXPN            |                | 0.11      | 0.10      | 1.01      | 9.87                           | 2.93  |
| G | IVT, $N_d = 6$   | CB              | $\Theta = 90$  | 0.17      | 0.12      | 0.98      | 4.50                           | 2.65  |
| H | IVT, $N_d = 6$   | EXPN            |                | 0.09      | 0.14      | 0.87      | 7.15                           | 2.75  |
| I | IVT, $N_d = 8$   | CB              | fluid          | 0.30      | 0.21      | 1.71      | 3.79                           | 3.08  |
| J | IVT, $N_d = 8$   | EXPN            |                | 0.05      | 0.15      | 0.87      | 8.58                           | 1.88  |
| K | HS, $N_d = 8$    | EXPN            | random         | 0.11      | 0.13      | 0.95      | 5.84                           | 1.91  |
| L | HS, $N_d = 6$    |                 | $\Theta = 60$  | 0.24      | 0.12      | 2.49      | 12.8                           | 4.20  |
| M | HS, $N_d = 6$    |                 | $\Theta = 90$  | 0.24      | 0.12      | 2.43      | 10.8                           | 4.12  |
| N | HS, $N_d = 6$    |                 | $\Theta = 180$ | 0.19      | 0.12      | 1.65      | 8.90                           | 3.30  |
| O | HS, $N_d = 8$    |                 | fluid          | 0.12      | 0.16      | 1.39      | 10.1                           | 2.88  |
| P | HS, $N_d = 10$   |                 |                | 0.13      | 0.12      | 1.50      | 11.7                           | 3.51  |

From Figs. 2 and 3. For each simulation resulting in multiple endosome jumps, we computed the averages of detachment duration  $T_D$ , recoil duration  $T_R$ , stall duration  $T_S$ , maximal frame velocity  $V_{maxf}$ , and the load sharing dyneins  $L_d$ . The mean of these averages from eight different simulations for each condition are tabulated above. The standard errors in these values are  $\sim 10\%$  of the values. All simulations in this table are run with an endosome size of 150 nm, dynein binding rate of 5/s, and unloaded dynein detachment rate of 0.4/s. The dynein-motor contact diffusion constant used for the fluid distribution is  $0.01 \mu\text{m}^2/\text{s}$ . See [Supporting Material](#) for additional information on the simulation and model parameters. CB, catch-bond kinetics; EXPN, exponential kinetics; HS, high stall force model with dynein stall force = 2.5 pN; IVT, in vitro model with dynein stall force = 1.25 pN.

detachment positions within each jump obtained from the model simulations showed significant qualitative differences with experiment (Fig. S4). We tried an extensive set of considerations, including different spatial distributions of dyneins on endosome (Fig. 4, B and C) and relaxed scans of parameters around the experimentally determined estimates. However, the simulated stall duration, detachment duration, and detachment velocity were not simultaneously consistent with experimental data using the in vitro stall force and detachment kinetics of dynein. For instance, clustering the dyneins within a narrow sector on the endosome increases dynein cooperation and the stall duration but results in significantly delayed detachments and rapidly interrupted recoil profiles that are qualitatively inconsistent with experimental data (Fig. S4). We also explored single-rate exponential detachment kinetics as well as a wide range of parameters within catch-bond detachment kinetics with minimal improvement in model performance. Although the exponential kinetics fit the detachment duration and detachment velocity reasonably well, the stall duration is underestimated by 30–50%.

We then tried a modified set of mechanochemical properties (i.e., the high stall force model) based on the in vivo force measurements on lipid droplet system (11,18,19). Specifically, we used a higher unitary stall force of 2.5 pN and single-rate exponential detachment kinetics for dynein (Supporting Material). Interestingly, we observed a very good fit to not only the averages but also the distributions of different metrics quantifying the experimental stalls and detachments using the high stall force model simulations with exponential detachment kinetics (Table 1, rows O–P).

The averages of stall duration, detachment duration, recoil duration, and detachment velocity could all be simulated with  $<15\%$  error using the experimentally constrained parameters. Fig. 5 A shows the simulated trajectory of a tethered endosome (Table 1, row O) exhibiting repeated stalls and detachments. Further, notable experimental features like the shoulders in stall profiles and the sudden, delayed, and sequential detachment profiles, etc., are all borne out by model simulations (Fig. 5 B). These results indicate that the detachment kinetics of dynein on endosomes differs substantially from in vitro measurements, within the accuracy of our model. A plausible reason could be the difference in stall force of dynein on endosome, which parametrically affects the detachment kinetics (7,18). It is also plausible that a pair of dyneins could function as a unit with a unitary stall force of  $\sim 2.5$  pN and significantly altered detachment kinetics.

### Spatial distribution of dyneins on the endosome in 3D model simulations

In analyzing the efficacy of the in vitro (1.25 pN) and high stall force (2.5 pN) models, we tried several considerations for the spatial distribution of dyneins on endosomes including random-fixed, cluster-fixed, and fluid distributions (Fig. 4, B and C). Briefly, for the random-fixed distribution, dyneins are randomly distributed and the dynein-endosome contact positions are fixed on the endosome surface during the simulation. For the cluster-fixed distribution, the dynein-endosome contact positions are randomly distributed and fixed on a spherical sector of the endosome surface

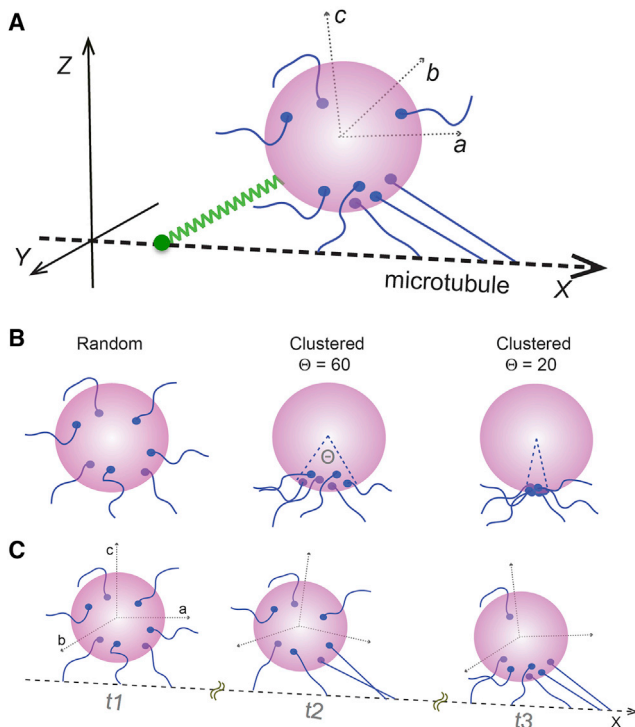

**FIGURE 4** 3D model for simulating the tethered endosome dynamics. (A) A schematic of the endosome with multiple dyneins in our 3D model is shown (see [Methods](#) and [Supporting Material](#)). ( $X, Y, Z$ ) is the laboratory frame and ( $a, b, c$ ) is the endosome frame of reference. (B) Random-fixed and clustered-fixed spatial distributions of dyneins on endosomes are shown. (C) Fluid distribution of dyneins on endosomes, which permits the dynein-endosome contacts to diffuse and slide under mechanical torque, is shown. To see this figure in color, go online.

subtending an angle  $\Theta$  (range of  $0-\pi$  radians) at the center of the endosome. For the fluid distribution, the dynein-endosome contact positions were allowed to diffuse ( $D = 0.001-0.1 \mu\text{m}^2/\text{s}$ ) and drift with torque on the endosome surface ([Fig. 4 C](#)). The statistics of simulated endosome stalls and detachments over a long time are highly sensitive to the nature of dynein distribution as detailed below.

#### *Fixed distributions of dyneins on endosomes are not consistent with experimental data*

**Random-fixed distribution.** The geometric activity of dyneins, and hence their cooperativity, is sensitive to the spatial distribution of dyneins even on endosomes as small as 150 nm and the random-fixed distribution is not conducive for dynein cooperativity. For a tethered 150 nm endosome with eight randomly distributed dyneins, the average number of dyneins sharing the load at detachment is  $<2$ . In order to have four dyneins cooperating on average, as seen in the experimental data (14), we need a total of 20 dyneins randomly distributed on the endosome (in vitro model). This is implausible based on immunostaining studies (12,20), which indicate that the maximum number of dyneins on neuronal vesicles is  $<12$ . The observation

that the number of cooperating dyneins on axonal endosomes ( $\sim 4$  on average (14)) is comparable to the total number of dyneins ( $\sim 5-7$  on average (12,20)) indicates some degree of dynein clustering even on the endosomes as small as 100–200 nm.

**Cluster-fixed distribution.** We then analyzed the cluster-fixed distributions of dyneins on endosome with  $\Theta$  ranging from  $\pi/30$  (all dyneins at one point) to  $\pi$  (all dyneins in one hemisphere). As expected, the dynein cooperativity is enhanced with decreasing  $\Theta$  due to an increasing number of dyneins that are geometrically active simultaneously. For a tethered 150 nm endosome with eight dyneins, the average number of dyneins sharing load at detachment is 4 for  $\Theta = \pi/30$ , 3.9 for  $\Theta = \pi/6$ , 3.8 for  $\Theta = \pi/3$ , 3.6 for  $\Theta = \pi/2$ , and 2.2 for  $\Theta = \pi$ . However, the stalls and detachment profiles for low  $\Theta$  values are inconsistent with the experimental data for both the in vitro ([Table 1](#), rows C–H) and high stall force ([Table 1](#), rows L–N) models. Clustering the dyneins on a narrow sector ( $\Theta < \pi/3$ ) not only increased the detachment duration (80–100% greater than seen in experiment) but also decreased the recoil duration (40%  $<$  experiment) due to fast rebinding of dyneins, which are all geometrically active. Further, clustered distributions with low  $\Theta$  resulted in a narrow distribution of large stalls due to uniform cooperativity and a bimodal distribution of minima between stalls due to frequently interrupted recoil profiles ([Fig. S4](#)), which clearly contrast the experimental data ([Fig. 3 B](#)). These results suggest that the dyneins are neither randomly distributed nor clustered at a spot (or too narrowly, as in  $\Theta < \pi/4$ ) on the endosome.

The high stall force model with clustered dynein distribution overestimates both the detachment duration and the stall duration ([Table 1](#), rows L–N) due to enhanced cooperative activity. We then considered the possibility that the spatial distribution of dyneins is dynamically evolving as opposed to being fixed at the initially recruited positions on endosome surface. It is plausible that the dynein-endosome contact positions are not rigidly fixed and retain some degree of mobility on endosome surface. We hypothesized that this scenario would result in partial clustering of dyneins to intermediate  $\Theta$  ( $\pi/4-\pi/2$ ) on endosomes, which might not only fit the data better but also explain the dynamic long time variations in detachment velocities seen in experiments. We therefore explored the fluid-distribution model where the dynein-endosome contact positions are allowed to diffuse and drift under mechanical torque ([Supporting Material](#)).

#### *Fluid distribution of dynein-endosome contacts leads to dynein clustering on endosomes*

With the fluid distribution, we first asked if the repeated stalls and detachments of dyneins on tethered endosomes could result in the spatial reorganization of dyneins on endosome surface. To this end, we simulated the dynamics of a tethered endosome (150 nm size, with eight dyneins) with



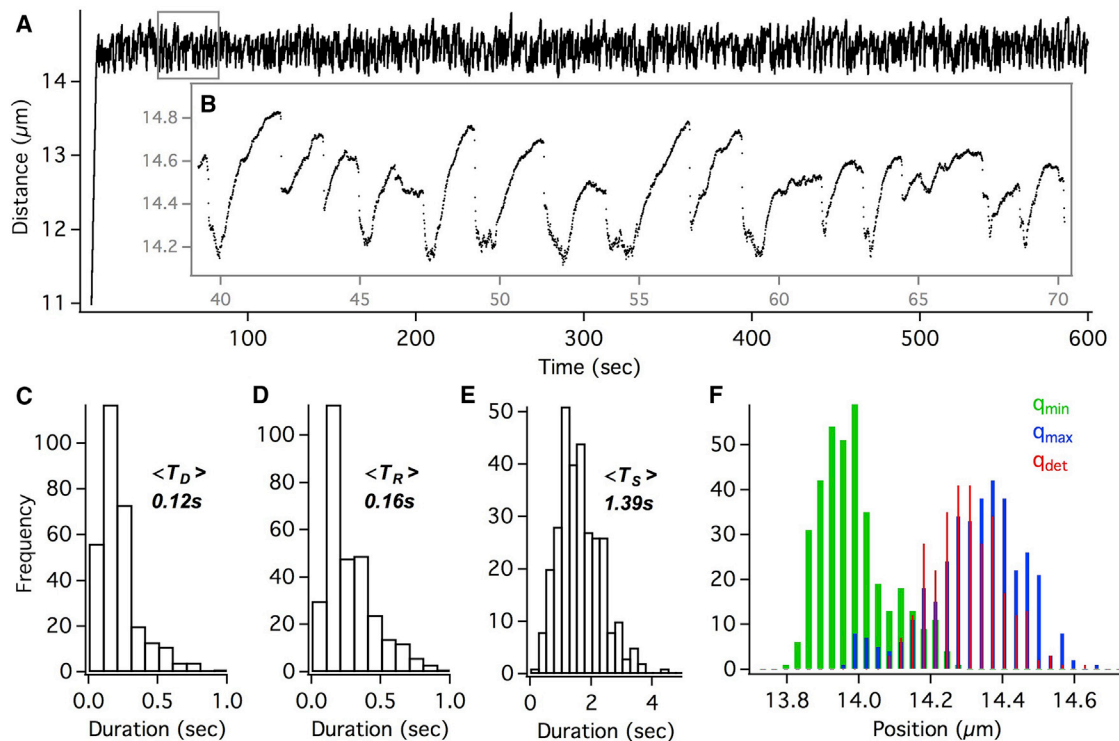

FIGURE 5 High stall force model simulation with fluid distribution of dyneins on endosome (Table 1, row O). (A) Simulated trajectory of the tethered endosome exhibiting repeated stalls and detachments is shown. (B) Zooming into the endosome jumps shows key features like sudden, delayed, and sequential detachment profiles. The distributions of  $T_D$ ,  $T_R$ , and  $T_S$  for the simulated endosome jumps are shown in (C), (D), and (E), respectively. (F) Histograms of  $q_{min}$ ,  $q_{max}$ , and  $q_{det}$  positions for the simulated endosome jumps are shown. To see this figure in color, go online.

the dynein-endosome contact diffusion constant in the range of  $D = 0.001\text{--}0.1 \mu\text{m}^2/\text{s}$ . Starting with randomly distributed dyneins, we monitored the spatial distribution of dyneins on the tethered endosome after 10 min of repeated stalls and detachments. Interestingly, in quite a few cases, we observed partial spatial pooling of dyneins (as in Fig. 4 C) on the endosome surface (Fig. 6, A and B). This can be rationalized as follows. Endosomes driven by multiple dyneins tend to maintain a stable orientation with respect to the microtubule for sustained periods of time. The asymmetric positioning of the microtubule can pool dyneins on the endosome surface due to two factors, including 1) the duty ratio of dyneins (microtubule binding/unbinding rate ratio  $>5$ ) prevents the geometrically active dyneins diffusing away from the region on endosome surface closer to the microtubule and 2) the torques exerted at the dynein-endosome contact positions, for dyneins under load, slide the contacts closer to the microtubule. Of course, the fluctuations of endosome orientation can prolong the timescale for spatial clustering and may also result in multiple clusters depending on the endosome size and viscosity. These results demonstrate that dyneins can dynamically be clustered on the endosome surface in response to load.

We then analyzed the tethered endosome stalls and detachments over a long time with fluid distribution of dyneins. The model simulations with fluid dynein distribution (high stall

force model) were quite successful in replicating the experimental data with minimal modification of the experimentally determined parameters (Fig. 2), as mentioned in the earlier section on in vivo model simulations (Fig. 5; Table 1). Notably, the simulations also show the dynamic variations in detachment velocities over a span of minutes, which correlate well with the number of load-sharing dyneins (Fig. 6 C). The quantitative accuracy of these model simulations supports the hypothesis that the dynamic clustering of dyneins could be a viable mechanism to facilitate the cooperativity of dyneins on axonal endosomes.

## DISCUSSION

The collective function of dyneins is fundamental for the retrograde transport of a diverse range of cellular cargos with different sizes and motility regimes. Broadly, the cooperativity of multiple dyneins is governed by several factors, including 1) molecular adaptations of dynein (7,18), 2) intracellular regulators modifying single dynein properties (21–23), and 3) mechanisms controlling the spatial assembly of dyneins on cellular cargos (9). Although there is extensive research in literature focused on the first two factors, our understanding of the spatial assembly of dyneins on cellular cargos is limited to specific micron-sized cargos. Probing the spatial assembly of dyneins on smaller cellular

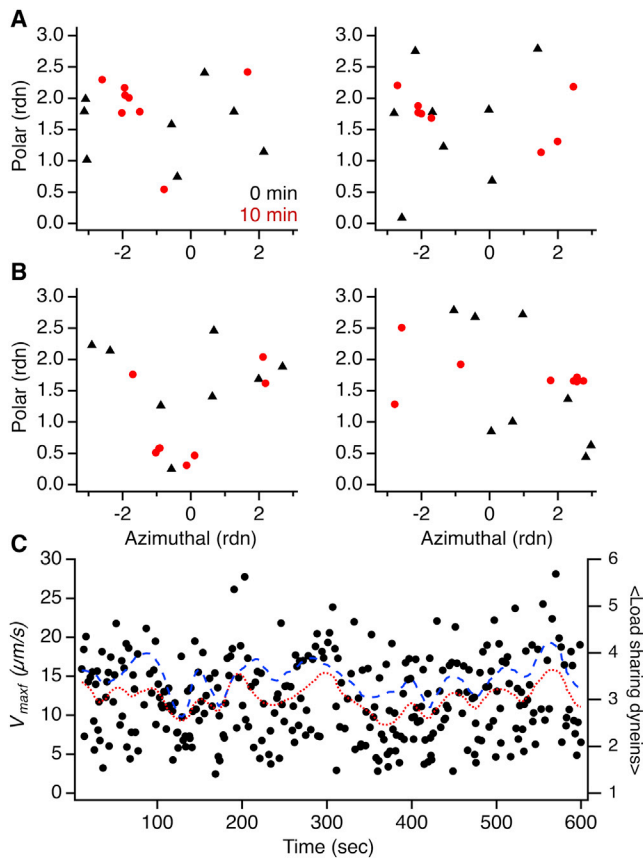

**FIGURE 6** Dynamic clustering of dyneins on tethered endosomes shown by high stall force model simulation with fluid distribution of dyneins on 150 nm endosomes. (A) The spatial distribution of dyneins on endosome is shown by plotting the endosome body coordinates (polar versus azimuthal angles) for each dynein-endosome contact position. The initial distribution is shown in black (filled triangles), and the distribution after 10 min of stalls/detachments is shown in red (filled circles).  $D = 0.001 \mu\text{m}^2/\text{s}$  (B), same as in (A), except  $D = 0.01 \mu\text{m}^2/\text{s}$ . (C) Dynamic variation in motor detachment velocities ( $V_{maxf}$  as black markers and  $\langle V_{maxf} \rangle$  as red line-dotted line) over a span of minutes from simulation is shown (Table 1, row P). The  $\langle V_{maxf} \rangle$  shows a clear correlation with the average number of load sharing dyneins (blue line-dashed line). To see this figure in color, go online.

cargos is not practical with direct approaches like optical trapping and immunostaining. In this work, we combined a new darkfield imaging assay and 3D stochastic models to analyze the spatial assembly and collective function of dyneins on retrograde endosomes in axons. Our results suggest that the dyneins are assembled in a semiclustered geometry even on endosomes as small as 100–200 nm. Further, we show that such a semiclustered distribution on endosomes can arise from dynamic clustering of dyneins during active transport under load, which can be an efficient mechanism for smaller cargoes. The high-accuracy tracking of GNP-endosome motility under load and the quantitative accuracy of our model simulations provide a better understanding of the spatial distribution and mechanochemical properties of dyneins endosomes.

### Dynamic clustering of dyneins on cellular cargoes: a generic mechanism?

Proteins and lipid microdomains are known to undergo diffusion in the cell membrane, with the diffusion constant ranging from  $0.01$  to  $0.1 \mu\text{m}^2/\text{s}$ . It is therefore plausible that the dynein-endosome contact positions are not completely rigid and retain some degree of mobility on the endosome surface. As a consequence, mechanical torques at dynein-endosome contact positions for stretched dyneins under load could result in the contacts sliding and clustering on endosome surface proximal to the microtubule. Our simulations show that even with highly constrained dynein-endosome contact diffusion ( $0.001 \mu\text{m}^2/\text{s}$ ), dyneins can dynamically assemble into semiclustered geometries on the endosome in response to load.

The dynamic clustering can be a particularly efficient mechanism for small cellular cargoes with a high geometrically active/inactive surface area ratio than larger cargoes. However, dynamic clustering by itself may not be enough to support the high cooperativity of dyneins seen on micron-sized cellular cargoes. Intracellular force measurements show that the collective forces on micron-sized cargoes can be up to 20 pN, indicating the cooperativity of around 10–15 dyneins. Additional structural interactions may be necessary for large cellular cargoes to keep all the dyneins clustered within one or more tight spots on cargo for high cooperativity. Recent work by Rai and coworkers demonstrated that the dyneins are spatially clustered on micron-sized late phagosomes in cells (9). More importantly, they also elucidated the likely structural interactions responsible for the clustering of dyneins within cholesterol microdomains on phagosomes. The fact that uniformly distributed dyneins on early phagosomes evolve into clustered distributions on late phagosomes indicates that the dynein-phagosome contacts are mobile before being trapped into tight spots by structural interactions (9). From a general perspective, the clustering mechanism could be cargo-specific and cargo size-dependent. It is quite plausible that a combination of dynamic clustering and cargo-specific structural interactions shape the assembly of dyneins on large cellular cargoes.

Evidence for dynamic clustering of motors on cellular cargoes under load could also be noted from other experimental data. Soppina and coworkers showed that large bidirectional endosomes in cells were elongated during pauses, resulting from tugs of war between teams of kinesins and dyneins (24). This indicates that the dyneins were not only clustered to cooperatively withstand the kinesin forces but also positioned spatially opposite to kinesins. Whereas structural interactions can be attributed to the clustering of dyneins, it is hard to rationalize the relative positioning of opposing motor teams. Such polarized spatial assembly of kinesins and dyneins on endosomes could potentially result from dynamic clustering under opposing load.

Recently, there were a few studies probing the collective forces of dyneins on populations of large cellular cargos using calibrated optical traps (6,7,9). However, there was no study probing the forces on the same cargo over long times, which is important to distinguish the stochastic and long-time dynamic variations in the collective mechanics of dyneins. Although some long time variations can be attributed to regulatory interactions coupled with cargo maturation, our results suggest that some dynamic variation can also result from fluid distributions of dyneins on cargos.

### Mechanochemical properties of dyneins on endosomes

In vitro measurements from several groups have established the stall force of dynein (1.1–1.25 pN) and the catch-bond detachment kinetics of dynein at superstall load (6,7,10,18). However, force measurements on a few large cellular cargos reveal system-dependent stall force of dynein in cells. Shubeita and coworkers, studying lipid droplet transport in vivo, show that the stall force of dynein is 2.5 pN (11). This is substantiated by other independent studies on lipid droplets in vivo (19). On the other hand, Rai and coworkers showed that the unit stall force of retrograde phagosomes in cells is 2.2 pN. This was interpreted as a pair of dyneins recruited by Rab7, thereby giving a stall force of 1.1 pN for dynein on phagosomes (7). The mechanical properties of dyneins extracted by modeling the single GNP-endosome jumps under load could therefore extend the current knowledge on the system dependence of dynein properties in cells.

A notable feature of our single-endosome data analysis based on tens of endosome stalls and detachments is that many model parameters (number of active motors, tether stiffness, friction coefficient, dynein velocity) can be roughly estimated from the experimental data. Further, there are several statistical metrics to be fit simultaneously, which is a rigorous test for different models. Within the accuracy of our 3D model, our results show that the in vitro model (1.25 pN stall force, in vitro detachment kinetics) has severe drawbacks, whereas the high stall force model (2.5 pN stall force) is reasonably accurate in simulating the experimental data. We note that the quantitative accuracy of high stall force model is not necessarily conclusive evidence for the stall force of dynein being 2.5 pN on endosomes. However, in conjunction with the results on lipid droplet system, it lends further credence to the presumed cargo dependence of dynein mechanical properties in cells. Our simulations indicate that the detachment kinetics of dyneins on endosomes differ significantly from in vitro measurements. It is plausible that this could be due to 1) altered mechanochemical properties of dynein complexes on endosome or 2) the function of a pair of dyneins as a unit with twice the stall force of a dynein and modified detachment kinetics. It was reported that the formation of dynein-dynactin-

BICD2 complex increases human dynein's force production to 4.3 pN (25). Further, a recent study shows that dynactin can recruit a second dynein that elevates the stall force and speed of the complex (26).

It is also worth discussing the caveats and limitations of our 3D model. Firstly, it is evident from the data reported earlier (14) and in this work that the endosome jumps are the result of an opposing force on the dyneins driving the endosome. However, the biochemical origins of this force are yet to be established. Understanding the mechanical nature of the force (beyond the simple elastic tether model) would be imperative to improve and substantiate the model simulations. Secondly, our model does not include any regulatory interactions between dyneins and adaptors or between the protofilament structure of the microtubule and protofilament switching of dyneins. It is plausible that such interactions play a critical role in altering the mechanochemical properties in cells as mentioned above (25,26). Thirdly, we note that the Brownian diffusion of dynein-endosome contacts is a simplification made to highlight the principle of dynamic clustering. However, the timescale of dynamic clustering and the eventual spatial distribution of motors could be modulated by structural domains on the cargo based on the size and specifics of cellular cargos.

### SUPPORTING MATERIAL

Supporting Materials and Methods, five figures, and three videos are available at [http://www.biophysj.org/biophysj/supplemental/S0006-3495\(18\)30629-5](http://www.biophysj.org/biophysj/supplemental/S0006-3495(18)30629-5).

### AUTHOR CONTRIBUTIONS

P.D.C. designed the research, carried out the experiments, formulated the model and ran the simulations, and wrote the manuscript. B.C. designed the research and wrote the manuscript. D.L.C. and L.K. carried out the experiments.

### ACKNOWLEDGMENTS

This work is supported by the US National Institute of Health (DP2-NS082125 and R01GM125737), the National Science Foundation (award numbers 1055112 and 1344302), and Packard fellowships for science and engineering.

### REFERENCES

- Holzbaur, E. L., and R. B. Vallee. 1994. DYNEINS: molecular structure and cellular function. *Annu. Rev. Cell Biol.* 10:339–372.
- Goldstein, L. S., and Z. Yang. 2000. Microtubule-based transport systems in neurons: the roles of kinesins and dyneins. *Annu. Rev. Neurosci.* 23:39–71.
- Perlson, E., S. Maday, ..., E. L. Holzbaur. 2010. Retrograde axonal transport: pathways to cell death? *Trends Neurosci.* 33:335–344.
- Chowdary, P. D., D. L. Che, and B. Cui. 2012. Neurotrophin signaling via long-distance axonal transport. *Annu. Rev. Phys. Chem.* 63:571–594.

5. Roberts, A. J., T. Kon, ..., S. A. Burgess. 2013. Functions and mechanics of dynein motor proteins. *Nat. Rev. Mol. Cell Biol.* 14:713–726.
6. Hendricks, A. G., E. L. Holzbaur, and Y. E. Goldman. 2012. Force measurements on cargoes in living cells reveal collective dynamics of microtubule motors. *Proc. Natl. Acad. Sci. USA.* 109:18447–18452.
7. Rai, A. K., A. Rai, ..., R. Mallik. 2013. Molecular adaptations allow dynein to generate large collective forces inside cells. *Cell.* 152:172–182.
8. Erickson, R. P., Z. Jia, ..., C. C. Yu. 2011. How molecular motors are arranged on a cargo is important for vesicular transport. *PLoS Comput. Biol.* 7:e1002032.
9. Rai, A., D. Pathak, ..., R. Mallik. 2016. Dynein clusters into lipid microdomains on phagosomes to drive rapid transport toward lysosomes. *Cell.* 164:722–734.
10. Blehm, B. H., T. A. Schroer, ..., P. R. Selvin. 2013. In vivo optical trapping indicates kinesin's stall force is reduced by dynein during intracellular transport. *Proc. Natl. Acad. Sci. USA.* 110:3381–3386.
11. Shubeita, G. T., S. L. Tran, ..., S. P. Gross. 2008. Consequences of motor copy number on the intracellular transport of kinesin-1-driven lipid droplets. *Cell.* 135:1098–1107.
12. Encalada, S. E., L. Szpankowski, ..., L. S. Goldstein. 2011. Stable kinesin and dynein assemblies drive the axonal transport of mammalian prion protein vesicles. *Cell.* 144:551–565.
13. Chowdary, P. D., D. L. Che, ..., B. Cui. 2015. Retrograde NGF axonal transport—motor coordination in the unidirectional motility regime. *Biophys. J.* 108:2691–2703.
14. Chowdary, P. D., D. L. Che, ..., B. Cui. 2015. Nanoparticle-assisted optical tethering of endosomes reveals the cooperative function of dyneins in retrograde axonal transport. *Sci. Rep.* 5:18059.
15. Cui, B., C. Wu, ..., S. Chu. 2007. One at a time, live tracking of NGF axonal transport using quantum dots. *Proc. Natl. Acad. Sci. USA.* 104:13666–13671.
16. Zhang, K., Y. Osakada, ..., B. Cui. 2010. Single-molecule imaging of NGF axonal transport in microfluidic devices. *Lab Chip.* 10:2566–2573.
17. Ghosh, R. N., and W. W. Webb. 1994. Automated detection and tracking of individual and clustered cell surface low density lipoprotein receptor molecules. *Biophys. J.* 66:1301–1318.
18. Kunwar, A., S. K. Tripathy, ..., S. P. Gross. 2011. Mechanical stochastic tug-of-war models cannot explain bidirectional lipid-droplet transport. *Proc. Natl. Acad. Sci. USA.* 108:18960–18965.
19. Leidel, C., R. A. Longoria, ..., G. T. Shubeita. 2012. Measuring molecular motor forces in vivo: implications for tug-of-war models of bidirectional transport. *Biophys. J.* 103:492–500.
20. Hendricks, A. G., E. Perlson, ..., E. L. Holzbaur. 2010. Motor coordination via a tug-of-war mechanism drives bidirectional vesicle transport. *Curr. Biol.* 20:697–702.
21. McKenney, R. J., M. Vershinin, ..., S. P. Gross. 2010. LIS1 and NudE induce a persistent dynein force-producing state. *Cell.* 141:304–314.
22. Tripathy, S. K., S. J. Weil, ..., S. P. Gross. 2014. Autoregulatory mechanism for dynactin control of processive and diffusive dynein transport. *Nat. Cell Biol.* 16:1192–1201.
23. Ayloo, S., J. E. Lazarus, ..., E. L. Holzbaur. 2014. Dynactin functions as both a dynamic tether and brake during dynein-driven motility. *Nat. Commun.* 5:4807.
24. Soppina, V., A. K. Rai, ..., R. Mallik. 2009. Tug-of-war between dissimilar teams of microtubule motors regulates transport and fission of endosomes. *Proc. Natl. Acad. Sci. USA.* 106:19381–19386.
25. Belyy, V., M. A. Schlager, ..., A. Yildiz. 2016. The mammalian dynein-dynactin complex is a strong opponent to kinesin in a tug-of-war competition. *Nat. Cell Biol.* 18:1018–1024.
26. Urnavicius, L., C. K. Lau, ..., A. P. Carter. 2018. Cryo-EM shows how dynactin recruits two dyneins for faster movement. *Nature.* 554:202–206.



**Biophysical Journal, Volume 115**

**Supplemental Information**

**Dynamic Clustering of Dyneins on Axonal Endosomes: Evidence from  
High-Speed Darkfield Imaging**

**Praveen D. Chowdary, Luke Kaplan, Daphne L. Che, and Bianxiao Cui**

# Dynamic clustering of dyneins on axonal endosomes - Evidence from high-speed darkfield imaging

Praveen D. Chowdary<sup>a</sup>, Luke Kaplan<sup>a</sup>, Daphne L. Che<sup>a</sup>, and Bianxiao Cui<sup>a,1</sup>

<sup>a</sup>Department of Chemistry, Stanford University  
380 Roth Way, Stanford, CA 94305, USA

<sup>1</sup> Corresponding Author: Bianxiao Cui

Email: bcui@stanford.edu

## Supplementary Information: Table of Contents

### 1. Experiments and Data processing

- 1.1 Single particle tracking of GNP-endosome transport in time lapse movies
- 1.2 Localization precision of GNPs with darkfield imaging at 1kHz
- 1.3 Detachment model fitting of selected endosome jumps
- 1.4 Maximum frame velocity and Instantaneous detachment velocity
- 1.5 Automated detection of extrema to quantify sequential endosome jumps
- 1.6 Single endosome motility under load imaged at 500 fps

### 2. 3D Stochastic model for multi-dynein endosome transport

- 2.1 Translational motion of endosome center of mass
- 2.2 Rotational motion of endosome
- 2.3 Motion of dynein-endosome contacts on endosome surface
- 2.4 Mechanochemical properties of dyneins
- 2.5 Monte Carlo simulation algorithm

2.6 Simulation of endosome stalls and detachments – Load from elastic tether

### **3. Stochastic model simulations**

3.1 Estimating model parameters from single-endosome experimental data

3.2 In vitro model simulations (clustered dynein distribution)

### **4. Statistical analysis of the peaks in experimental distributions**

## 1. Experiments and data processing

### 1.1 Single particle tracking of GNP-endosome transport in time lapse movies:

Semi-automated custom Matlab software is used to extract endosome trajectories ( $X(t), Y(t)$ ) from the time lapse movies of axonal transport as described earlier (1). Briefly, we used 2D-Gaussian fitting adapted to detect the locations of endosomes (with GNPs) in each movie frame. We then used a particle-tracking algorithm, adapted from Jaqaman et al. (2), to link these detected locations into endosome trajectories. The flux of endosome transport, kept very sparse by controlled incubation conditions, lead to minimal tracking errors. Occasional errors associated with crossing trajectories are corrected by manual inspection in the final step of processing. For each endosome trajectory, we extracted the underlying microtubule track ( $Q^x, Q^y$ ) using an edge-based tracing algorithm. Using this microtubule track, the endosome trajectory is converted from camera pixels ( $X(t), Y(t)$ ) to microtubule coordinates ( $Q^{\parallel}(t), Q^{\perp}(t)$ ) representing the motion parallel and perpendicular to the microtubule (1). Since the microfluidic channels (and hence the axons) are aligned along the  $X$ -axis of the camera,  $X(t)$  is an approximation for  $Q^{\parallel}(t)$ .

*Drift correction:* For GNP-endosome trajectories spanning multiple movies, we corrected for the stage drift and mechanical disturbances using stationary scattering objects within the movies as internal references. We note that these references are associated with some highly scattering structures within axons and exhibited a slow drift with time. Therefore, some residual drift even within the reference corrected GNP-endosome trajectories cannot be ruled out completely.

### 1.2 Localization precision of GNPs with darkfield imaging at 1 kHz:

We obtained the localization precision of our darkfield imaging system using the standard approach detailed in literature (3). Briefly, we imaged the 80 nm GNPs stuck on a coverslip surface at 1 kHz for a duration of 22 seconds and then tracked the positions of the GNPs as discussed above. In order to correct for the long-time drift in measuring the localization precision, we subtracted the coordinates of pairs of GNPs (Fig. S0A) and got the distribution of differences for each pair (Fig. S0B). The standard deviation of this distribution of differences divided by  $\sqrt{2}$  gives the localization precision of  $4.4 \pm 0.8$  nm (Mean  $\pm$  SD,  $N = 9$ ).

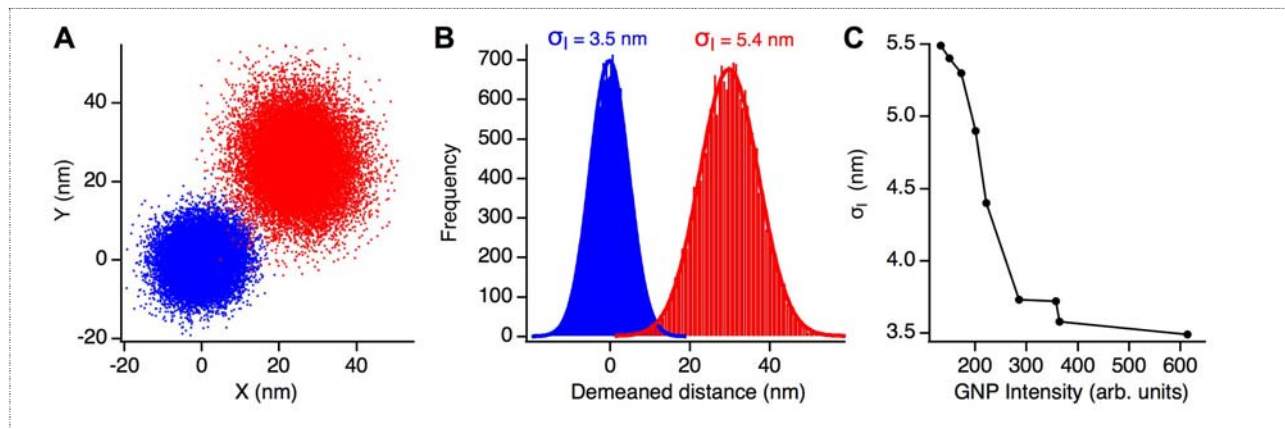



**Figure S1:** Localization precision ( $\sigma_l$ ) of 80 nm GNPs with darkfield imaging. A) Referenced and demeaned position coordinates of two GNPs over 22 seconds of tracking at 1 kHz. The red distribution is offset for clarity. B) Demeaned difference distributions of the two GNPs shown in (A). The red distribution is offset for clarity. The standard deviation divided by  $\sqrt{2}$  gives the localization precision  $\sigma_l$ . C) Localization precision as a function of the GNP intensities (spanning the range of GNP intensities in this work).

### **1.3 Detachment model fitting of endosome jumps:**

We previously described (4) how the endosome jumps (gradual stalling followed by dynein detachment) can be explained by considering that the endosome is docked to the microtubule by an elastic tether. The dyneins pulling the tethered endosome are slowed down by the elastic restoring force of the tether ( $F_{opp} = -kx$ ) opposing the endosome motion. The endosome gradually stalls as the tether is stretched and  $F_{opp}$  reaches the stall force of the leading dyneins. When the stalled dyneins detach from the microtubule, the endosome recoils back under the influence of  $F_{opp}$ . We also presented a model for dynein detachment under the elastic tether load to fit the post detachment recoil profiles of endosome jumps (4). Our model shows that the recoil profile is an exponential with a damping constant  $k/\gamma$ , where  $k$  is the tether stiffness and  $\gamma$  is the friction coefficient of the medium. Specifically, the endosome recoil is described by Eq. S1, where  $t_d$  is the detachment time,  $V_{detach}$  is the instantaneous recoil velocity of endosome at detachment, and  $k/\gamma$  is the damping constant. By fitting the single-endosome jumps with uninterrupted recoil profiles, we can obtain the damping constant  $k/\gamma$  for the endosome.

$$q(t) = q_s + \frac{C}{D} (1 - \exp(-D(t - t_d))) ; \quad C = V_{detach} ; \quad D = \frac{k}{\gamma} ; \quad t > t_d \quad (S1)$$

### **1.4 Maximum frame velocity and Instantaneous detachment velocity:**

The endosome trajectory in Fig. 2 of main text (acquired at 100 fps) exhibited  $\sim 500$  stalls and detachments over a time of 18 minutes. However, the recoil profile following motor detachment is often interrupted within 30 – 40 ms, possibly by lagging microtubule-bound dyneins or fast rebinding of detached dyneins. In such cases, with a limited recoil range of 3 – 4 time points, fitting the exponential form in Eq. S1 would lead to inaccurate fit parameters ( $V_{detach}$  and  $k/\gamma$ ). We therefore used the maximum frame velocity ( $V_{maxf}$ ), which is easy to compute, as a simple statistical metric to compare the model simulations and experiment in this work. The maximum frame-to-frame velocity ( $<V_{detach}$ ) is correlated to the instantaneous detachment velocity ( $V_{detach}$ ) depending on the imaging frame rate and the damping constant  $k/\gamma$  of the recoil profiles. We simulated hundreds of recoil profiles using Eq. S1, with a wide range of  $V_{detach}$  values and fixed  $k/\gamma$ , and digitized the profiles at 100 Hz. We then extracted the  $V_{maxf}$  for each of these profiles and observed a linear relationship (that depends on frame rate and  $k/\gamma$ ) between  $V_{maxf}$  and  $V_{detach}$ .

### **1.5 Automated detection and quantification of sequential endosome jumps:**

In order to quantify the sequential stalls and detachments in the experimental and simulated trajectories, we used the following automated routine. First, we used a sliding window of 0.5s to identify the extrema (minima and Maxima) in the endosome trajectory. In cases where there are two successive minima (or Maxima), we identified the missed intermediate maximum (or minimum) in the second step. These steps successfully identified each of the endosome jumps as a minimum-Maximum-minimum (m-M-m) sequence in the trajectory as shown in Fig. S1. We then identified the detachment point within each m-M-m sequence as the time point preceding the time-point with the maximum frame-to-frame velocity. Finally, we selected only those m-M-m sequences that exhibited the recoil for at least two successive frames following the detachment point as valid endosome jumps. This step removes the spurious m-M-m sequences with no obvious motor detachment. We then computed the histograms of the variables like stall duration, detachment duration, and recoil duration for each endosome jump as shown in Fig. 3 (main text).

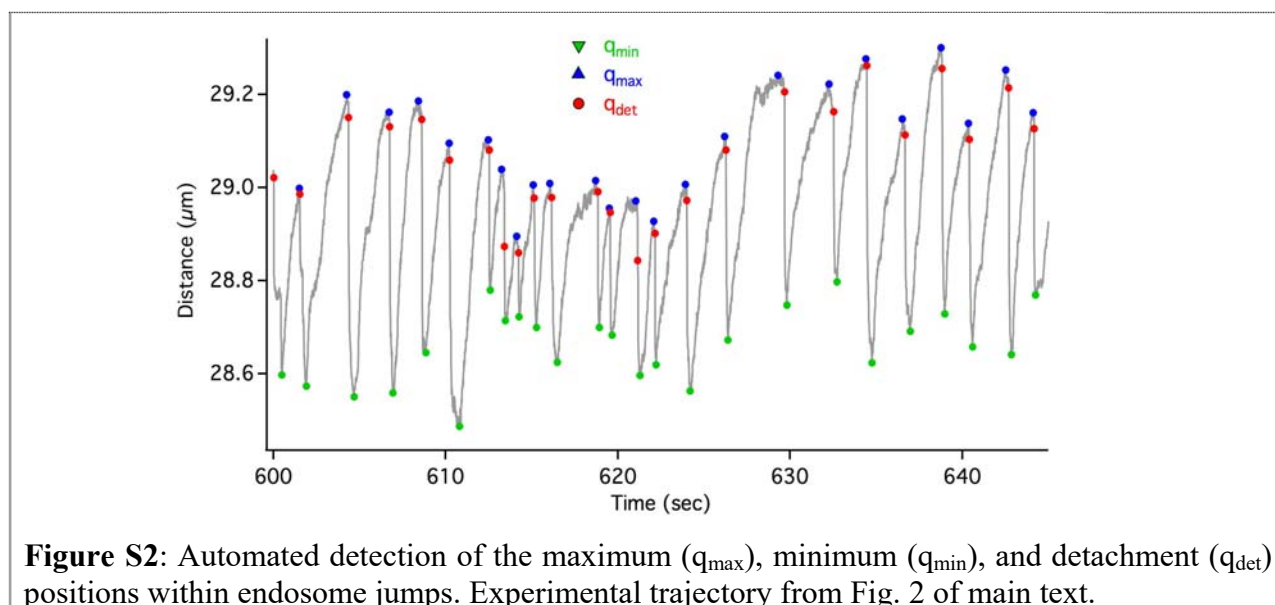

### 1.4 Single endosome motility under load imaged at 500 fps:

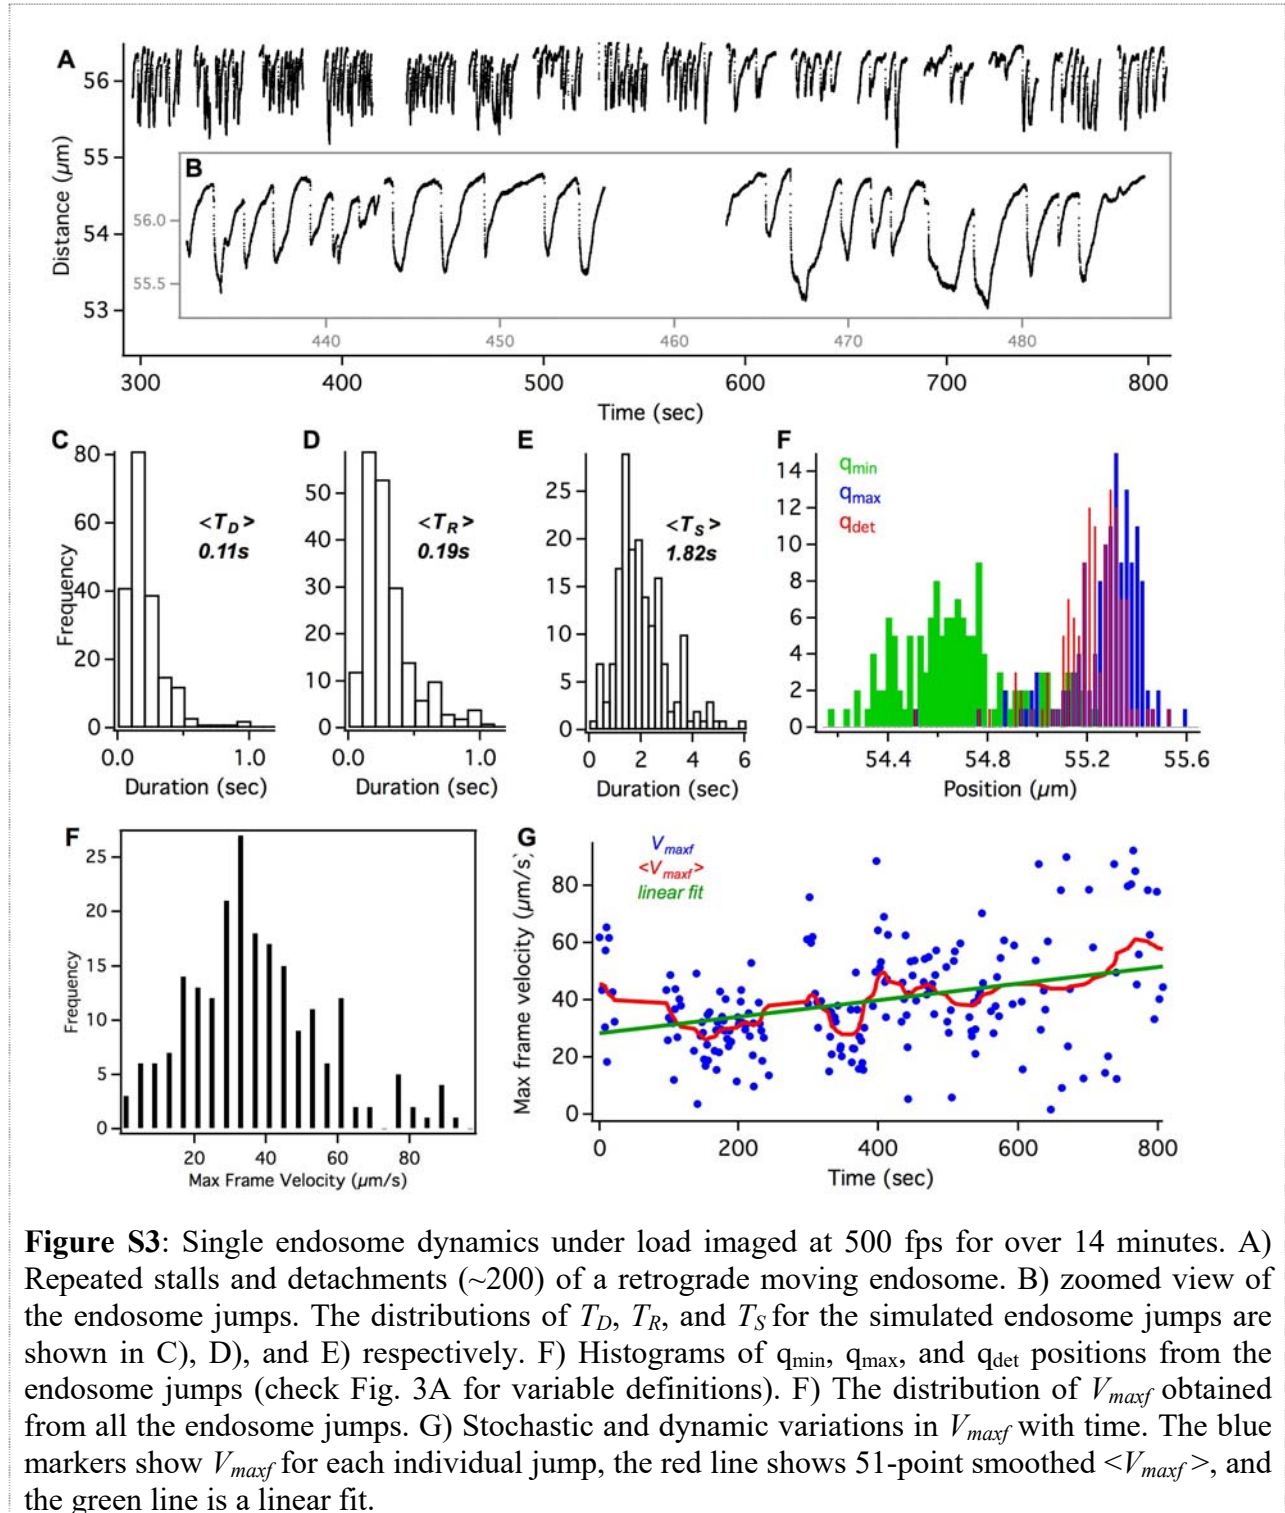

## 2. 3D stochastic model for multiple dynein endosome transport

### 2.1 3D stochastic mechanical model:

Multi-motor 1D mechanical models for cargo transport, based on Monte Carlo simulation of cargo trajectories, have been elaborated for different motility regimes in literature (5-7). Erickson et al. have also presented a prototypical 3D stochastic model for cargo transport by multiple kinesins (8). Our 3D stochastic model, for endosome transport by multiple dyneins, is based on this prototype with key modifications in modeling the mechanochemical properties and the spatial distribution of dyneins on endosomes. Here we briefly summarize the general characteristics as well as the details specific to our 3D model.

We modeled the endosome as a hard sphere (radius  $R$ ) driven by a stable number of endosome-bound dyneins ( $N_d$ ) walking on a microtubule (along  $x$ -axis of lab frame) in 8 nm steps. The dyneins are distributed either in a random or clustered geometry on the endosome and when geometrically possible the dyneins can repeatedly bind to (rate =  $\pi/s$ ) and detach from (rate =  $\varepsilon/s$ ) the microtubule. At any instant, the dyneins engaged on microtubule can step forward ( $k_f/s$ ) or backward ( $k_{back}/s$ ), or detach ( $\varepsilon/s$ ) from the microtubule with well-defined rates given below. The motors are treated as harmonic springs that exert a restoring force  $f = -k(l-l_0)$  and torque on the endosome when stretched beyond their rest length  $l_0$ . The dynein-endosome contact positions are either rigidly fixed or allowed to diffuse and slide under torque on the endosome surface. At any instant, the endosome position/orientation is determined by the net force/torque exerted by dyneins and the thermal forces (see below).

The 3D motion of endosome can be separated into translational and rotational components as follows. Briefly, the translational motion of the endosome center of mass is described in terms of the laboratory frame ( $x, y, z$ ) with the microtubule modeled simply as a 1D lattice of 8nm steps along the  $x$ -axis. The rotational motion is described in terms of the endosome frame of reference ( $a, b, c$ ) related to the lab frame by Euler angles ( $\theta(t), \phi(t), \psi(t)$ ) according to the  $x$ -convention. In what follows, we present the relevant equations for translational and rotational motion derived in detail by Erickson et al (8) and the procedure for dealing with dynein-endosome contact motion on the endosome surface.

### 2.2 Translational Motion:

The translational motion of the endosome center of mass is governed by Eq. S2, where  $v(t)$  is the instantaneous velocity of endosome,  $\gamma_T$  is the friction coefficient of the medium, and  $F_{th}(t)$  is the random thermal force on endosome.

$$m \frac{d\vec{v}(t)}{dt} = -\gamma_T \vec{v}(t) + \vec{F}(\vec{q}, t) + \vec{F}_{Th}(t); \quad \gamma_T = 6\pi\eta R$$



$$\vec{F}(\vec{q}, t) = k \sum_{i=1}^{M_d} \left( l_i(\vec{q}, t) - l_i^0 \right) \cdot \hat{l}_i(\vec{q}, t) + \vec{F}_{ext}(\vec{q}) \quad (\text{S2})$$

$F(q, t)$  is the net force on endosome obtained as the sum of forces exerted by the stretched dyneins ( $M_d \leq N_d$ ) and any other external force on endosome. Solving Eq. S2, it can be shown that (8) the stochastic displacement of endosome center of mass over a time step  $dt$  is given by Eq. S3, where  $\sigma_T$  is the translational diffusion length and  $\vec{\varepsilon} = (\varepsilon_x, \varepsilon_y, \varepsilon_z)$  is a vector of independent standard normal deviates. While the second term on the right hand side represents the drift of endosome under net force, the third term represents the random thermal motion of the endosome.

$$\vec{q}(t + dt) \approx \vec{q}(t) + \frac{dt}{\gamma_T} \vec{F}(\vec{q}, t) + \sigma_T \vec{\varepsilon}; \quad \sigma_T = \sqrt{\frac{2k_b T}{\gamma_T} dt} \quad (\text{S3})$$

### **2.3 Rotational Motion:**

The rotational motion of the endosome is governed by Eq. S4 which is the torque equation in the lab frame, where  $w(t)$  is the instantaneous angular velocity of endosome,  $\gamma_R$  is the rotational friction coefficient, and  $\vec{\tau}_{Th}$  is the random torque on endosome.

$$I \frac{d\vec{w}(t)}{dt} = -\gamma_R \vec{w}(t) + \vec{\tau}(\vec{q}, t) + \vec{\tau}_{Th}(t); \quad \gamma_R = 8\pi\eta R^3$$

$$\vec{\tau}(\vec{q}, t) = k \sum_{i=1}^{M_d} \vec{R}_i(\vec{q}, t) \times \left( l_i(\vec{q}, t) - l_i^0 \right) \cdot \hat{l}_i(\vec{q}, t) + \vec{\tau}_{ext}(\vec{q}) \quad (\text{S4})$$

$\vec{\tau}(\vec{q}, t)$  is the net torque on endosome obtained as the sum of torques exerted by stretched dyneins ( $M_d \leq N_d$ ) and any other external torque on endosome. Solving Eq. S4, it can be shown that (8) the stochastic rotational motion of endosome over a time step  $dt$ , in terms of Euler angles, is given by Eq. S5, where  $\sigma_R$  is the rotational diffusion angle over the time step  $dt$  and  $(\varepsilon_\theta, \varepsilon_\phi, \varepsilon_\psi)$  are independent standard normal deviates.

$$\theta(t + dt) = \theta(t) + \frac{dt}{\gamma_R} \left( \tau_x(\vec{q}, t) \cdot \cos \phi(t) + \tau_y(\vec{q}, t) \cdot \sin \phi(t) \right) + \sigma_R \varepsilon_\theta$$

$$\phi(t + dt) = \phi(t) + \frac{dt}{\gamma_R} \left( \tau_z(\vec{q}, t) + \left[ -\tau_x(\vec{q}, t) \cdot \sin \phi(t) + \tau_y(\vec{q}, t) \cdot \cos \phi(t) \right] \cdot \cot \theta(t) \right) + \sigma_R \varepsilon_\phi$$

$$\psi(t + dt) = \psi(t) + \frac{dt}{\gamma_R} \frac{\left( \tau_x(\vec{q}, t) \cdot \sin \phi(t) - \tau_y(\vec{q}, t) \cdot \cos \phi(t) \right)}{\sin \theta(t)} + \sigma_R \varepsilon_\psi$$

$$\sigma_R = \sqrt{\frac{2k_b T}{\gamma_R}} dt \quad (\text{S5})$$

## **2.4 Motion of dynein-endosome contacts on endosome surface:**

Our 3D model also considers the mobility of dynein-endosome contact positions on the endosome surface. Though the 2D diffusion of protein/lipid microdomains on cell membranes is expected to be confined or anomalous, treating this as a Brownian diffusion process is reasonable within the accuracy of our model simulations. We therefore considered that the dynein-endosome contacts can undergo Brownian diffusion on endosome surface with an effective diffusion constant  $D_M$  (typically  $0.01 - 1 \mu\text{m}^2/\text{s}$  on cell membranes, which is equivalent to  $0.01/R - 1/R \text{ radian}^2/\text{s}$ , where  $R$  is the endosome radius). Further, the dynein-endosome contact can also slide on the endosome surface under torque when dynein is stretched beyond its restlength. The friction coefficient for this membrane diffusion/sliding process is given by  $\gamma_M = k_b T / D_M$  and the equations of motion for this process can be obtained as follows.

Consider the dynein-endosome contact point A sliding under torque on the endosome surface while the endosome orientation is fixed. The coordinates of point A over time can equivalently be obtained by assuming that the point A is fixed on the endosome surface and the endosome is undergoing rotational motion with rotational drag constant  $\gamma_M$  (instead of  $\gamma_R$  in Eq. S5). The stochastic motion of the dynein-endosome contact position over a time step  $dt$  can therefore be determined using the equivalent changes in Euler angles given by Eq. S6 (analogous to Eq. S5) See the Monte Carlo simulation algorithm below for details.

$$\begin{aligned} d\theta(t) &= \theta(t+dt) - \theta(t) = \frac{dt}{\gamma_M} \left( \tau_x(\vec{q}, t) \cdot \cos\phi(t) + \tau_y(\vec{q}, t) \cdot \sin\phi(t) \right) + \sigma_M \varepsilon_\theta \\ d\phi(t) &= \phi(t+dt) - \phi(t) = \frac{dt}{\gamma_M} \left( \tau_z(\vec{q}, t) + \left[ -\tau_x(\vec{q}, t) \cdot \sin\phi(t) + \tau_y(\vec{q}, t) \cdot \cos\phi(t) \right] \cdot \cot\theta(t) \right) + \sigma_M \varepsilon_\phi \\ d\psi(t) &= \psi(t+dt) - \psi(t) = \frac{dt}{\gamma_M} \frac{\left( \tau_x(\vec{q}, t) \cdot \sin\phi(t) - \tau_y(\vec{q}, t) \cdot \cos\phi(t) \right)}{\sin\theta(t)} + \sigma_M \varepsilon_\psi \\ \gamma_M &= \frac{k_b T}{D_M} \quad \text{and} \quad \sigma_M = \sqrt{2D_M dt} \end{aligned} \quad (\text{S6})$$

## **2.5 Mechanochemical properties of dyneins:**

### **Forward/backward stepping rates of dynein**

The restlength  $l_0$  of dynein is nominally considered to be 70 nm, while the motor stiffness  $k$  is 0.32 pN/nm and the step length  $d$  is 8 nm. We modeled the forward and backward stepping rates

of dynein in two different ways using 1) a model based on the experimental force-velocity curve from in vitro measurements (9), and 2) an approximate analytical model.

*Experimental model:* The forward stepping rate as a function of load is modeled by the exponential decay in Eq. S7 where  $v_f^0$  is the unloaded motor velocity,  $f$  the load on motor, and  $F_s$  the motor stall force. Though, the load dependence of dynein backward stepping rate is not explicitly reported, superstall measurements in optical traps (5, 9) show minimal backward motion even at a load of 10 pN. Therefore, we modeled the backward stepping rate using a shallow exponential given by Eq. S7, where  $\Gamma = 40$  reflects the unloaded backward stepping rate of dynein seen in experiments. The exponential factors  $C_1$ ,  $C_2$  are determined by requiring that a) the forward stepping rate is equal to the backward stepping rate at the motor stall force ( $f = F_s$ ), and b) the net velocity as a function of load fits the experimental force-velocity curve of dynein (9).

$$k_f = v_f/d; \quad v_f = v_f^0 \exp(-C_1 * f) \quad (S7)$$

$$k_{back} = \frac{v_b}{d}; \quad v_b = \frac{v_f^0}{\Gamma} \exp(C_2 * f)$$

*Analytical model:* The forward stepping rate is modeled by Eq. S8 where  $v_f^0$  is the unloaded motor velocity,  $f$  the load on the motor,  $F_s$  the motor stall force, and  $n = 0.5$  is the nonlinearity. The backward stepping rate is modeled by a slow rising exponential given by Eq. S8, where  $\Gamma = 40$  reflects the unloaded backward stepping rate of dynein seen in experiments. In earlier studies the detachment rate is modeled using a similar functional form with  $C_2 = 1/F_d$ , where  $F_d$  is the detachment scale (see below).

$$k_f = v_f/d; \quad v_f = v_f^0 \left(1 - \left(\frac{f}{F_s}\right)^n\right) \quad (S8)$$

$$k_{back} = \frac{v_b}{d}; \quad v_b = \frac{v_f^0}{\Gamma} \exp(C_2 * f)$$

## Detachment kinetics of dynein

In vitro measurements show that dynein exhibits an exponential detachment rate under load till its stall force and catch-bond detachment kinetics above the stall force (5, 9). The functional form of dynein detachment kinetics is therefore parametrically dependent on the stall force of dynein. For the in vitro model (1.25 pN stall force of dynein) in this manuscript, we modeled the detachment rate  $\varepsilon$  based on the in vitro catch-bond detachment kinetics from Kunwar et al. (5) given by Eq. S9, where  $\varepsilon^0$  is the unloaded detachment rate and  $F_d$  is the detachment scale.

$$\varepsilon = \varepsilon^0 \exp\left(\frac{f}{F_d}\right); f < F_s \quad \& \quad \varepsilon = \varepsilon^0 \left(0.254 * \left(1 - \exp\left(-\frac{f}{1.96646}\right)\right)\right)^{-1}; f \geq F_s \quad (S9)$$

We also tried the single rate exponential kinetics given by Eq. S10 for all values of  $f$ . For the in vivo model (2.5 pN stall force of dynein) in this manuscript, we modeled the detachment rate  $\varepsilon$  based on the single rate exponential kinetics given by Eq. S10.

$$\varepsilon = \varepsilon^0 \exp\left(\frac{f}{F_d}\right) \quad (\text{S10})$$

## **2.6 Monte Carlo simulation algorithm:**

### Monte Carlo simulation – Initiation:

For a given endosome size (radius  $R$ ), the number of dyneins ( $N_d$ ), and spatial distribution of dyneins (Random or Cluster angle  $\Theta$ ) the simulation is initiated as follows.

1. Start the simulation with the endosome positioned 15nm above origin on the  $z$ -axis of the lab frame ( $x, y, z$ ) at time 0. The endosome frame ( $a, b, c$ ) is initially aligned to lab frame with the Euler angles  $(\theta, \theta, \theta)$ . The microtubule lattice of 8nm steps is set along  $x$ -axis.
2. Attach  $N_d$  dyneins (cargo binding ends) on endosome surface in a random or clustered geometry as described above. For random distribution, the dynein-endosome contacts are randomly distributed on the endosome surface. For clustered distribution, the dynein-endosome contacts are randomly distributed on a spherical sector of the endosome surface subtending an angle  $\Theta$  (range of 0 to  $\pi$  radians) at the center of the endosome.
3. The geometrically active dyneins (i.e. dyneins that can reach the microtubule without stretching beyond restlength or passing through the endosome) are then attached to randomly chosen microtubular sites accessible within the restlength of motors.

### Monte Carlo simulation – Propagation:

We then continuously update the states (i.e. bound or unbound to microtubule) of dyneins, the positions of dyneins on microtubule, dynein-endosome contact positions on endosome surface, and the position/orientation of endosome at each time step ( $dt = 0.5\mu\text{s}$ ) in the following sequence.

4. Check the motor extensions and compute the force exerted by each motor (i.e the load on each motor). These are used to compute the forward/backward stepping and detachment rates for each dynein in the following step.
5. Loop through each dynein on the endosome and take one of the following actions if the dynein is bound to the microtubule.
  - Step 8nm forward with probability  $P = k_f * dt$
  - Step 8nm backward with probability  $P = k_b * dt$
  - Detach from microtubule and relax to restlength with probability  $P = \varepsilon * dt$
  - Remain at the same position if none of the above happens



If the dynein is not bound to microtubule and is geometrically active (i.e. can reach the microtubule without passing through endosome) then, attach it to a random microtubular site accessible within its restlength with probability  $P = \pi * dt * \zeta$ , where  $\zeta$  is the ratio of the number of accessible microtubular sites to the maximum number of accessible sites for the motor length given by  $2l_0/8$ .

6. [Optional step when simulating endosome motility against the load of an elastic tether]. If the current simulation time is greater than a preset duration (typically 10s) and the closest distance between the endosome and the microtubule is less than a preset tether length  $L_T$ , then connect the closest points on the endosome and microtubule with an elastic tether of length  $L_T$  and stiffness  $k$ . If a tether is already established, then ignore this step.
7. If all motors are detached and the endosome is not connected to the microtubule anymore (i.e. no external tether), then randomize the endosome orientation, and reattach the geometrically active dyneins to microtubule as in step 3.
8. Update all the states (bound or unbound) and positions of the motors on the microtubule simultaneously.
9. Compute the motor extensions and the force exerted by each dynein on the endosome. Compute the external force (i.e. from any elastic tether connecting the endosome and the microtubule as discussed below). Compute the net force on the endosome using Eq. S2.
10. Compute the new position of the endosome center of mass using Eq. S3.
11. Compute the torques exerted at each of the dynein-endosome contact. Compute the external torque (i.e. from any elastic tether connecting the endosome and the microtubule as discussed below). Compute the net torque on the endosome using Eq. S4.
12. For each dynein-endosome contact under torque, compute the equivalent changes in the Euler angles of endosome representing the displacement of the dynein-endosome contact on the endosome surface using Eq. S6. Perform a rotational transformation of the dynein-endosome contact position using these angles to obtain the new position of the dynein-endosome contact on the endosome surface. Update all the new positions of the dynein-endosome contact positions simultaneously.
13. Compute the changes in the Euler angles of the endosome due to the net torque computed in step 10 using Eq. S5.
14. Update the new position and orientation of the endosome.
15. Following an initial stabilization period of around 5 – 10s, start recording the averages of relevant variables (endosome center of mass position, endosome orientation, number of motors cooperatively driving the transport etc.) at an acquisition rate equivalent to the experimental imaging rate (100 – 500 Hz).
16. Repeat steps 4 – 14 till the any of the simulation termination conditions are met.

#### Monte Carlo simulation – Termination:

The simulation is terminated when any of the following termination conditions is met and the recorded variables are saved for subsequent analysis.

17. The simulation is terminated when the simulation time exceeds the initially set time duration in the range of 5 – 20 minutes, or optionally if the distance covered by the endosome exceeds the camera field of view.
18. Finally, we add Gaussian noise ( $\sigma = 5 - 10\text{nm}$ ) to the simulated trajectory (position of the endosome center of mass) to replicate the localization accuracy of our system.

## **2.7 Simulation of endosome stalls and detachments – Load from elastic tether:**

As mentioned above, the endosome stalls and detachments can be explained by considering that the endosome is docked to microtubule by an elastic tether that exerts load when stretched. In order to simulate the endosome stalls and detachments, we therefore modeled the opposing load as resulting from an elastic tether docking the endosome to the microtubule. Briefly, we start with an endosome being driven by  $N_d$  dyneins. After a preset duration (typically 10s) of unloaded transport, we suddenly establish a physical tether of nominal length  $L_T = 50$  nm and stiffness  $k$  between the endosome and microtubule as explained in step 6 of Monte Carlo simulation algorithm. The tether buckles freely under pressure but exerts a restoring force  $F_{ext} = -k*(L-L_T)$  when stretched beyond  $L_T$  (included in Eq. S2).

Fig. 5A (main text) shows a simulated trajectory of an endosome repeatedly stalling against such elastic load and detaching from the microtubule. The endosome stall and recoil profiles depend on the number of motors, their binding rate, their unitary stall force, and the load dependence of their velocity and detachment kinetics.

## **3. Stochastic model simulations**

### **3.1 Estimating model parameters from single-endosome experimental data:**

For an endosome with tens of sequential stalls/detachments, many of the model parameters can be determined from the experimental data. Here, we present the parameter estimation for the endosome with multiple jumps shown in Fig. 2 of main text.

1. The forward and backward stepping rates of dynein are estimated using the run velocity of the endosome before exhibiting stalls and detachments based on the details given above (Eq. S8.)
2. Based on the peak multiplicity (110 – 120 nm) in the jump size and detachment velocity distributions we estimated the involvement of  $\sim 8$  dyneins on the endosome.
3. Considering the 110 nm as the stall size of a single dynein, the tether stiffness  $k$  is estimated as  $k = F_s / 110$  pN/nm, where  $F_s$  is the stall force of dynein.
4. We then selected a few endosome jumps with near-exponential recoil profiles and fit them to Eq. S1 to obtain  $k/\gamma = 81 \pm 6.7/\text{s}$  for 65 jumps with  $<10\%$  fit error.
5. The friction coefficient  $\gamma$  is then obtained as  $\gamma = F_s * 0.001 / (110 * 81)$  Ns/m
6. The effective axonal viscosity for endosomes is estimated as  $\eta \sim 0.1$  Ns/m<sup>2</sup>.
7. We then estimated the radius of the endosome as  $R = \gamma / 6\pi\eta$ . From these considerations we obtained the following initial parameter estimates for the model simulations.

In vitro model ( $F_s = 1.25$  pN):  $R_d = 75, 149$  nm for  $\eta = 0.1, 0.05$  Ns/m<sup>2</sup> respectively.

High stall force model (2.5 pN):  $R_d = 75, 149, 298$  nm for  $\eta = 0.2, 0.1, 0.05$  Ns/m<sup>2</sup> respectively.

All the simulations in Table 1 (main text) were run with the endosome radius 75 nm. The assumption of a single dynein per 110 nm stall size gives an initial estimate for the number of active dyneins on the endosome. However, we have also explored a wide range of parameters in our model simulations around these initial estimates. For instance, while the initial estimate based on Fig. 2B was 8 dyneins, the motor number is varied from 6 – 14 in model simulations and the best result is considered for any given model in Table 1. Our intention was to ensure that a model failure was not due to an incorrect initial estimate for the motor number. While the high stall force model with exponential kinetics gave a good fit with the initial estimate of 8 – 10 motors, the in vitro model (with in vitro detachment kinetics) fared poorly over this entire range of parameters. However, the high stall force model with exponential kinetics fit the experimental data with minimal modification of the experimentally estimated parameters. We note that the results of model simulations were negligibly affected within the range of 110 – 120 nm for single dynein stall size.

We also considered the assumption of 2 dyneins per 110 nm jump in our simulation which gives an initial estimate of ~16 active dyneins on the endosomes. This is beyond the range of the number of dyneins on neuronal vesicles reported by immunostaining studies so far. Further, for 16 dyneins to be geometrically active they need to be clustered at least within one hemisphere of the endosome. Simulations with the in vitro model under these conditions offered no improvement over the assumption of 1 dynein per 110 nm.

### 3.2 In vitro model simulations (clustered dynein distribution):

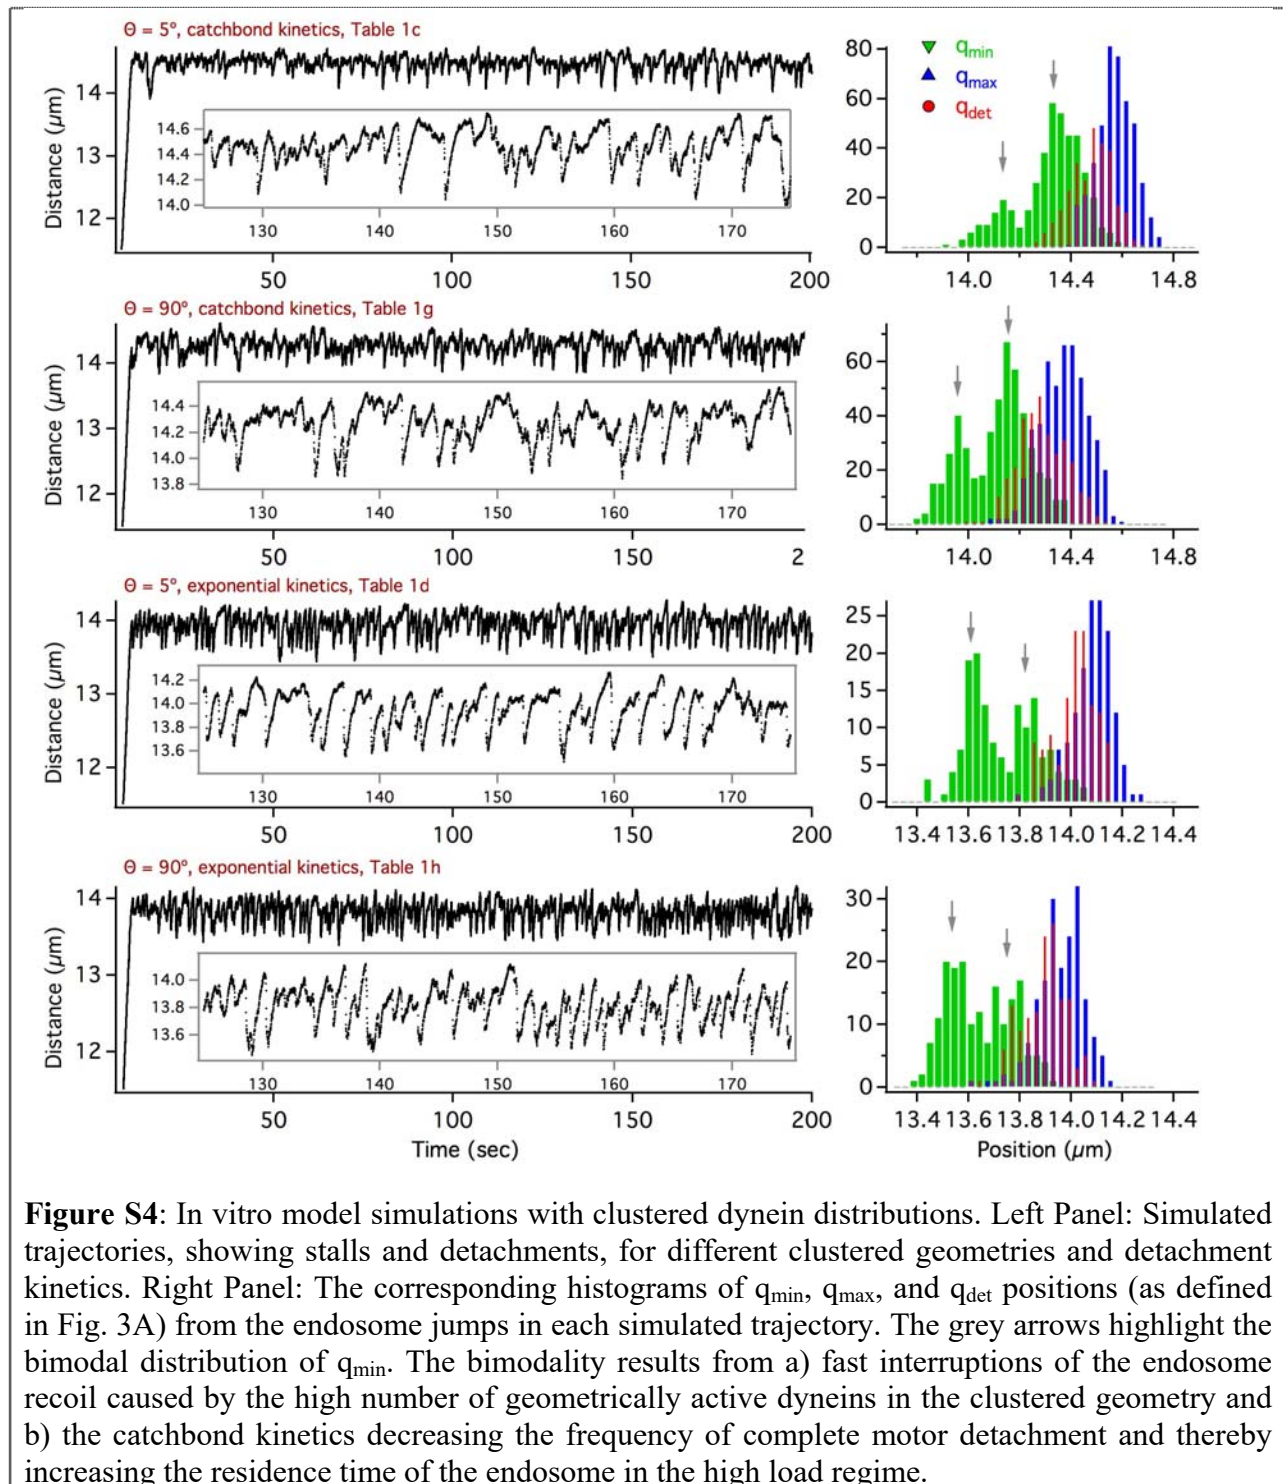

## 4. Statistical analysis of the peaks in experimental distributions

### *Power spectrum analysis:*

We used the power spectrum analysis to determine if there were roughly evenly spaced peaks in the jump size and maximum frame velocity distributions, corresponding to discrete numbers of active motors (Fig. S4 A,B). A probability density function of the data was obtained using kernel density estimation with a normal kernel of width 5 nm for jump size ( $q_d$ ) and 0.6  $\mu\text{m/s}$  for velocity ( $v_d$ ) distributions. As a null hypothesis, a unimodal Weibull function was fit to the data. Control distributions were generated by bootstrapping the null hypothesis and generating power spectra to estimate a 90% confidence interval for a unimodal distribution. Frequencies above the 95<sup>th</sup> percentile of the null hypothesis were considered as statistically significant.

Figure 1 demonstrates this method for the velocity distribution (Fig. 2C of main text). Figure 1A shows simulated distributions of the velocity data by randomly sampling six evenly spaced Gaussian distributions with their means spaced 5.1  $\mu\text{m/s}$  apart. If the peak width is very narrow (top panel, 0.5  $\mu\text{m/s}$ ) the peaks are clearly distinguishable, but as the peak width approaches the spacing, the peaks are harder to distinguish (bottom panel, 5  $\mu\text{m/s}$ ). The power spectral densities as a function of peak width are shown in Fig. S4B with a very prominent peak at narrow peak widths (0.5  $\mu\text{m/s}$ , dark blue line) and no clear peak at large widths (5.0  $\mu\text{m/s}$ , dark red line). The power spectral density of the experimental velocity data (Fig. 2C of main text) is shown in black. The peak height of the experimental data is close to that of the 3.6  $\mu\text{m/s}$  wide peaks in the simulated data (middle panel of Figure 1A).

Figure 1C shows the power spectral density of the experimental data overlaid on the power spectral density of the null hypothesis Weibull fit to this data (blue line, 90% confidence intervals in gray). The power at the frequency corresponding to 5.1  $\mu\text{m/s}$  is higher than the 95<sup>th</sup> percentile of the unimodal fit.

The same analysis applied to the jump size distribution (Fig. 2B of main text) confirmed the statistical significance of peaks with an approximate spacing of 120 nm.

### *Maximum likelihood estimation of peak spacing in $v_d$ and $q_d$ distributions:*

As a separate method for determining the peak spacing, the distributions of  $v_d$  and  $q_d$  were fit to a Gaussian mixture model where each Gaussian is defined by a position, width, and amplitude. In our model, each Gaussian represents the discrete number of motors pulling the endosome prior to the detachment, so the spacing between successive Gaussians is the contribution of a single motor unit. Therefore, instead of independently assigning a position, width, and amplitude to each peak in the distribution, we fit a single model to the whole distribution for each endosome.

The model has six parameters: the spacing between peak centers ( $p$ ), the position of the first peak ( $\mu_0$ ), the width of each peak ( $\sigma_0$ ), and a noise term allowing for peak broadening as more motors participated in a given jump ( $\eta$ ). These four parameters define the position and width of each Gaussian. Two additional parameters,  $\lambda$  and  $K$  define the amplitude by determining the probability of a given number of motors participating in each jump.  $\lambda$  and  $K$  are obtained by fitting the data to a Weibull distribution where  $K$  is the shape parameter and  $\lambda$  is the scale parameter. In the initial Weibull fit,  $\lambda$  is in units of velocity or distance (for  $v_d$  and  $q_d$  respectively), which can be converted to number of motors by dividing by the spacing parameter,



$p$  (in units of velocity/motor or distance/motor for  $v_d$  and  $q_d$  respectively). It is this rescaled  $\lambda$  that is used in the Gaussian mixture model.

Negative log likelihood was estimated by convolving the model with each data point and its error estimated from the fitting of individual jumps, thereby accounting for differences in error across different jumps.

$$\mu_n = \mu_o + np \quad (\text{S11})$$

$$\sigma_n = \sigma_o + \sqrt{n}\eta \quad (\text{S12})$$

$$P(\#motors = n) = \frac{K}{\lambda} \left(\frac{n}{\lambda}\right)^{K-1} \exp\left(-\left(\frac{n}{\lambda}\right)^K\right) \quad (\text{S13})$$

$$\sum_{i=1}^{\infty} \sum_{j=1}^J -\log(P(i) \int_{-\infty}^{\infty} N(\mu_i, \sigma_i) N(\mu_j, \sigma_j) dx) \quad (\text{S14})$$

Where  $N$  is the normal distribution;  $\mu_i, \sigma_i$  are from equations S11, S12; and  $\mu_j, \sigma_j$  are the  $j^{\text{th}}$  data point from the experiment and its associated standard error with  $J$  total data points (i.e.  $J$  total jumps). This construction allows for calculation of  $p$  from all the data at once. It also means that the number of parameters in the model is fixed, irrespective of the number of peaks in the distribution. This is in contrast to a conventional Gaussian mixture model where the number of parameters grows with the number of Gaussians fit.

We found that expectation maximization was sensitive to the initial guess of  $p$ , as can often be in the case of maximum likelihood approaches. Therefore, to avoid overfitting, we performed the fit with several initial guesses of  $p$ . The initial values and upper and lower bounds are set such that the distribution is fit by increasing integer number of Gaussians starting from one going up to  $p = 2\mu\text{m/s}$  or  $p = 25\text{nm}$  for  $v_d$  and  $q_d$  respectively. For each fit, we computed the Akaike information criterion (AIC) taking the number of Gaussians in the mixture as the number of parameters.

We then used the parameter value at the AIC minimum as the initial guess for the fit, and then maximized the likelihood without the upper and lower bound constraints in MATLAB. We found that this approach worked well to avoid overfitting the distributions of  $v_d$  and  $q_d$  for the simulated trajectories where the number of motors is known. The confidence intervals of the fit were computed from the inverse of the information matrix calculated at the maximum likelihood parameter values.

Using this approach, we found the peak spacing of 119 (107, 131) nm for the jump sizes and 4.7 (4.2, 5.1)  $\mu\text{m/s}$  for detachment velocities (numbers in parentheses represent the 95% confidence interval). Fig. S4D,E show the Gaussian mixture model fits overlaid on the experimental distributions of jump size and maximum frame velocities (Fig. 2 of main text).

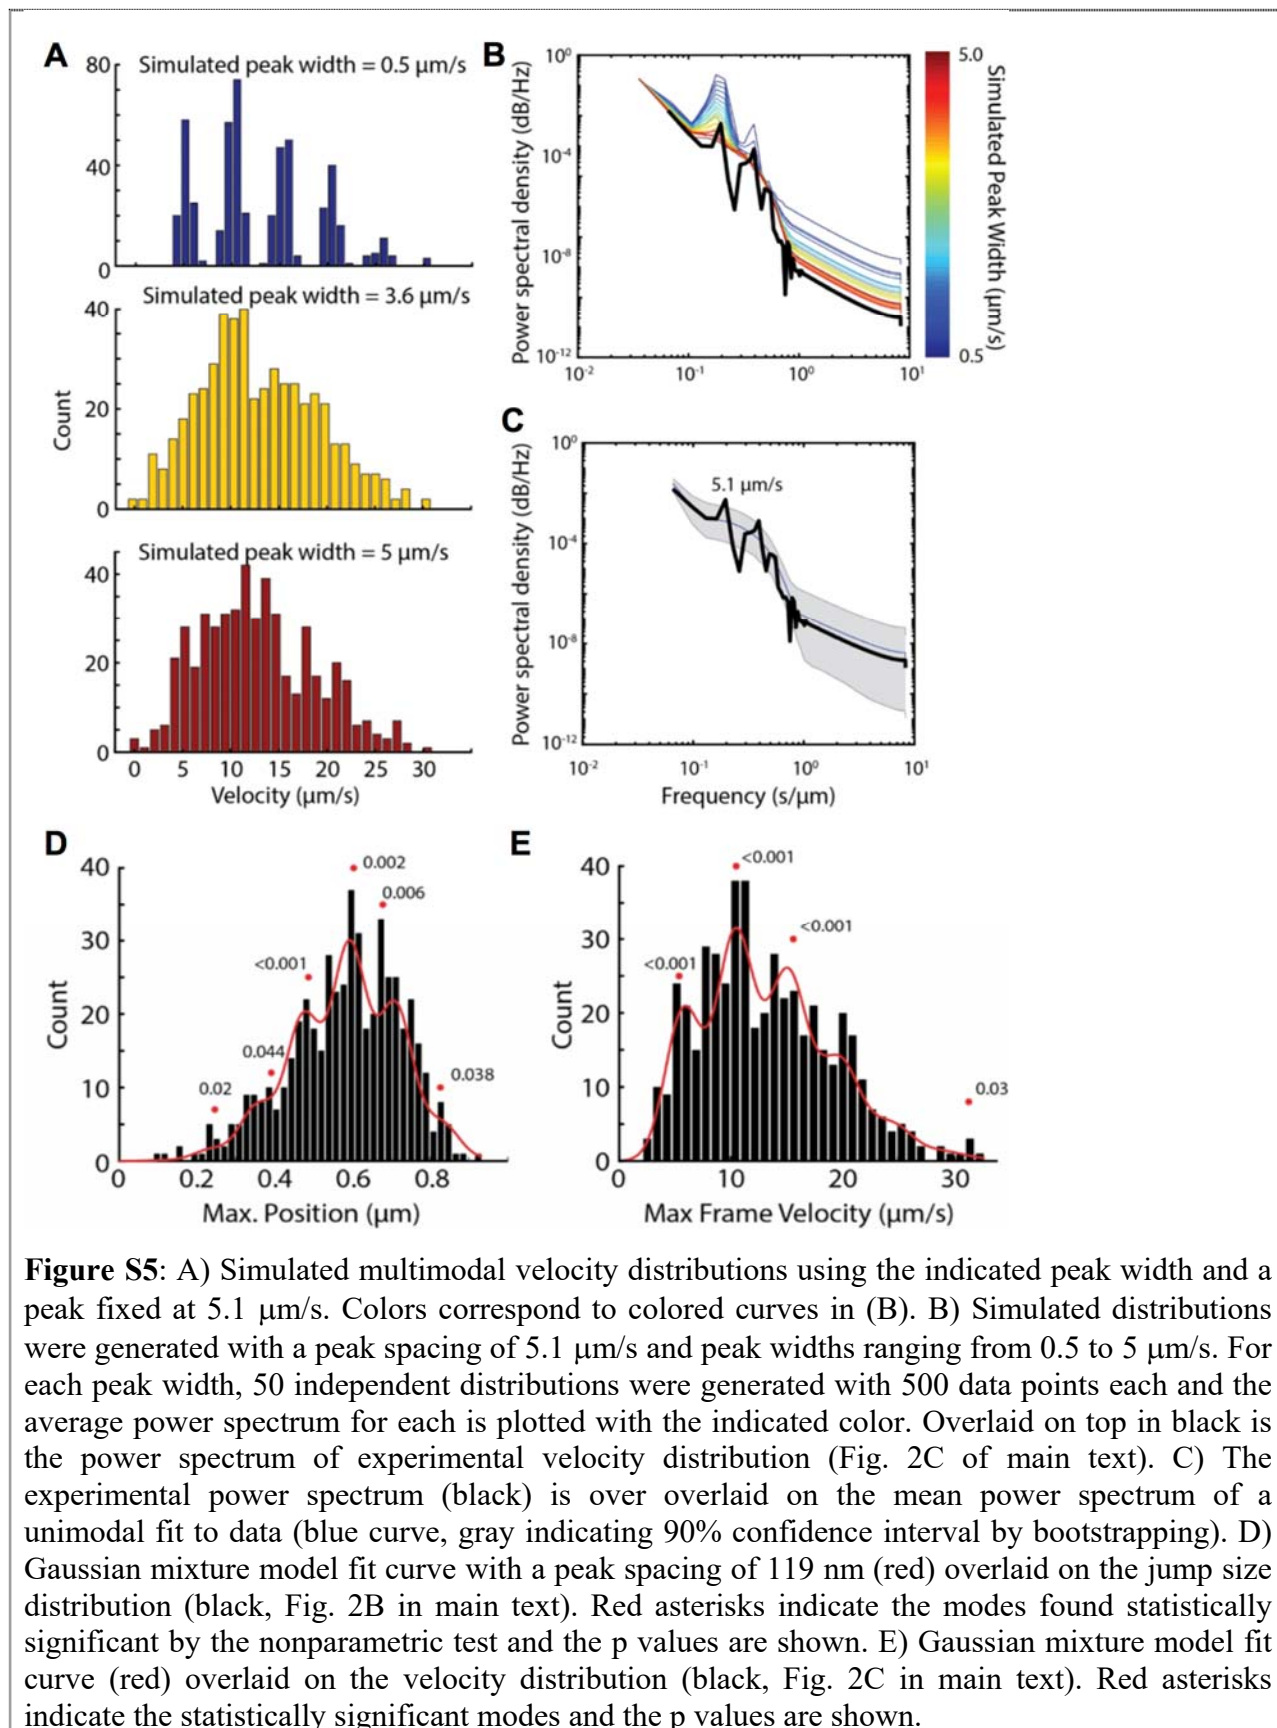

---

***Statistical significance of modes:***

We then used two different established methods to ascertain the statistical significance of the possible modes in the data. First, we then used a nonparametric approach (10, 11) to specifically test the statistical significance of the modes in the data. This approach found statistically significant peaks ( $p$  value  $< 0.05$ ) in the jump size data at the following locations: 246 nm, 392 nm, 487 nm, 603 nm, 679 nm, 827 nm. A red asterisk indicates the location of each peak in Fig. S4D and the corresponding  $p$  values are listed above each peak. We note that this peak identification approach is nonparametric and the exact peak locations are sensitive to noise in the data. However, the peak locations are close to the modes identified in the above analysis and gave a mean peak spacing of 116 nm. Similarly, for the maximum frame velocity distribution, we find significant peaks at 5.4, 10.5, 15.6, and 31.3  $\mu\text{m/s}$  (Fig. S4E) and the mean peak spacing is 5.1  $\mu\text{m/s}$ .

Next, we used the Silverman's test for multimodality (12), which identified the three most prominent peaks in the distribution located at 486, 601, and 682 nm for the jump size distribution at a level of  $p < 0.05$ . For the velocity distribution, three peaks are also identified at 10.6, 19.5, and 31.1  $\mu\text{m/s}$ . We note that the Silverman's test has been found to be quite conservative, and can miss peaks particularly in the case of variable peak amplitudes (10, 13), as is the case in the data herein.

## Supporting References:

1. Chowdary, P. D., D. L. Che, K. Zhang, and B. Cui. 2015. Retrograde axonal NGF transport - Motor coordination in the unidirectional motility regime. *Biophys J* 108:2691-2703.
2. Jaqaman, K., D. Loerke, M. Mettlen, H. Kuwata, S. Grinstein, S. L. Schmid, and G. Danuser. 2008. Robust single-particle tracking in live-cell time-lapse sequences. *Nat Meth* 5:695-702.
3. Ghosh, R. N., and W. W. Webb. 1994. Automated detection and tracking of individual and clustered cell surface low density lipoprotein receptor molecules. *Biophys J* 66:1301-1318.
4. Chowdary, P. D., D. L. Che, L. Kaplan, O. Chen, K. Pu, M. Bawendi, and B. Cui. 2015. Nanoparticle-assisted optical tethering of endosomes reveals the cooperative function of dyneins in retrograde axonal transport. *Scientific Reports* 5:18059.
5. Kunwar, A., S. K. Tripathy, J. Xu, M. K. Mattson, P. Anand, R. Sigua, M. Vershinin, R. J. McKenney, C. C. Yu, A. Mogilner, and S. P. Gross. 2011. Mechanical stochastic tug-of-war models cannot explain bidirectional lipid-droplet transport. *Proc Natl Acad Sci U S A* 108:18960-18965.
6. McKenney, R. J., M. Vershinin, A. Kunwar, R. B. Vallee, and S. P. Gross. 2010. LIS1 and NudE Induce a Persistent Dynein Force-Producing State. *Cell* 141:304-314.
7. Ori-McKenney, K. M., J. Xu, S. P. Gross, and R. B. Vallee. 2010. A cytoplasmic dynein tail mutation impairs motor processivity. *Nat Cell Biol* 12:1228-U1256.
8. Erickson, R. P., Z. J. Jia, S. P. Gross, and C. C. Yu. 2011. How Molecular Motors Are Arranged on a Cargo Is Important for Vesicular Transport. *PLoS Comput. Biol.* 7:22.
9. Rai, A. K., A. Rai, A. J. Ramaiya, R. Jha, and R. Mallik. 2013. Molecular Adaptations Allow Dynein to Generate Large Collective Forces inside Cells. *Cell* 152:172-182.
10. Minnotte, M. C. 1997. Nonparametric testing of the existence of modes. *Ann. Stat.* 25:1646-1660.
11. Minnotte, M. C., and D. W. Scott. 1993. The Mode Tree: A Tool for Visualization of Nonparametric Density Features. *J. Comput. Graph. Stat.* 2:51-68.
12. Silverman, B. W. 1981. Using kernel density estimates to investigate multimodality. *J. R. Stat. Soc. Ser. B-Methodol.* 43:97-99.
13. Hall, P., and M. York. 2001. On the calibration of Silverman's test for multimodality. *Stat. Sin.* 11:515-536.
